# Supplementary material
Source: Royal Society of Chemistry journal article supplement (doi:10.1039/d6cc00799f)

# Supporting Information

## **Bi(NO<sub>3</sub>)<sub>3</sub>/TEMPO dual catalysis for aerobic oxidation of alcohols**

Zhenhua Xu,<sup>a,\*</sup> Yi Xu,<sup>a</sup> Yamin Zhang,<sup>a</sup> Xiaoxiao Hu,<sup>a</sup> Yong Xie,<sup>a</sup> Zhiqiang Shi,<sup>a</sup> and Huawen Huang<sup>b,c\*</sup>

<sup>a</sup> *School of Chemistry and Chemical Engineering, Suzhou University, Suzhou, Anhui 234000, People's Republic of China. E-mail: Xuzhenhua@ahszu.edu.cn.*

<sup>b</sup> *Key Laboratory for Green Organic Synthesis and Application of Hunan Province, Key Laboratory of Environmentally Friendly Chemistry and Application of Ministry of Education, College of Chemistry, Xiangtan University, Xiangtan 411105, China. E-mail: hwhuang@xtu.edu.cn.*

<sup>c</sup> *School of Chemistry and Chemical Engineering, Henan Normal University, Xinxiang, 453007, China.*

### Table of Contents

|                                                                        |            |
|------------------------------------------------------------------------|------------|
| <b>1. General information.....</b>                                     | <b>S1</b>  |
| <b>2. Optimization of reaction conditions.....</b>                     | <b>S2</b>  |
| <b>3. General procedure for the aerobic oxidation of alcohols.....</b> | <b>S3</b>  |
| <b>4. Metrics calculations.....</b>                                    | <b>S5</b>  |
| <b>5. Competition reaction.....</b>                                    | <b>S6</b>  |
| <b>6. Characterization data of products.....</b>                       | <b>S7</b>  |
| <b>7. References .....</b>                                             | <b>S19</b> |
| <b>8. NMR Spectra of products.....</b>                                 | <b>S21</b> |

## 1. General information

Reactions via general procedure were carried out under an oxygen atmosphere unless otherwise noted. Column chromatography was performed using silica gel (200-300 mesh).  $^1\text{H}$  NMR,  $^{13}\text{C}$  NMR spectra were recorded on Bruker-AV (400, 100, MHz, respectively) instrument using  $\text{CDCl}_3$  as solvent. Chemical shifts are given in ppm and coupling constants in 400 Hz. Chemical shift values are reported in  $\delta$  (ppm) relative to  $\text{CDCl}_3$  ( $^1\text{H}$  NMR,  $\delta = 7.26$ ;  $^{13}\text{C}$  NMR,  $\delta = 77.00$ ). Mass spectra were measured on Agilent 5977 GC-MS instrument (EI). High-resolution mass spectra (ESI) were obtained with the Thermo Scientific LTQ Orbitrap XL mass spectrometer. Melting points were measured with a YUHUA X-5 melting point instrument and were uncorrected. The structures of known compounds were further corroborated by comparing their  $^1\text{H}$  NMR data with those in literature. In order to indicate the signal multiplicity, the following abbreviations were used: s (singlet), d (doublet), t (triplet), q (quartet) and m (multiplet) as well as combinations of them.

## 2. Optimization of reaction conditions.<sup>a</sup>

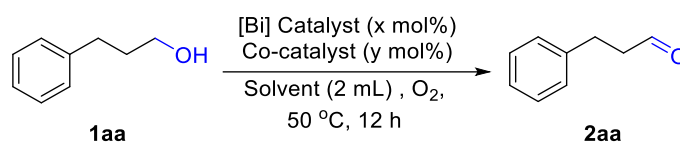

| Entry           | [Bi] Catalyst                                         | co-catalyst       | x/y         | Solvent            | Yield (%) <sup>b</sup> |
|-----------------|-------------------------------------------------------|-------------------|-------------|--------------------|------------------------|
| <b>1</b>        | <b>Bi(NO<sub>3</sub>)<sub>3</sub>•5H<sub>2</sub>O</b> | <b>TEMPO</b>      | <b>10/5</b> | <b>1,4-dioxane</b> | <b>90</b>              |
| 2               | BiOCl                                                 | TEMPO             | 10/5        | 1,4-dioxane        | 25                     |
| 3               | [Bi]TPP                                               | TEMPO             | 10/5        | 1,4-dioxane        | 40                     |
| 4               | Bi(OTf) <sub>3</sub>                                  | TEMPO             | 10/5        | 1,4-dioxane        | 30                     |
| 5               | BiCl <sub>3</sub>                                     | TEMPO             | 10/5        | 1,4-dioxane        | trace                  |
| 6               | Bi(NO <sub>3</sub> ) <sub>3</sub> •5H <sub>2</sub> O  | DTBP              | 10/5        | 1,4-dioxane        | n.r                    |
| 7               | Bi(NO <sub>3</sub> ) <sub>3</sub> •5H <sub>2</sub> O  | DDQ               | 10/5        | 1,4-dioxane        | n.r                    |
| 8               | Bi(NO <sub>3</sub> ) <sub>3</sub> •5H <sub>2</sub> O  | TBHP              | 10/5        | 1,4-dioxane        | n.r                    |
| 9               | Bi(NO <sub>3</sub> ) <sub>3</sub> •5H <sub>2</sub> O  | APS               | 10/5        | 1,4-dioxane        | n.r                    |
| 10              | Bi(NO <sub>3</sub> ) <sub>3</sub> •5H <sub>2</sub> O  | Et <sub>3</sub> N | 10/5        | 1,4-dioxane        | n.r                    |
| 11              | Bi(NO <sub>3</sub> ) <sub>3</sub> •5H <sub>2</sub> O  | TEMPO             | 5/5         | 1,4-dioxane        | 48                     |
| 12              | Bi(NO <sub>3</sub> ) <sub>3</sub> •5H <sub>2</sub> O  | TEMPO             | 15/5        | 1,4-dioxane        | 92                     |
| 13              | Bi(NO <sub>3</sub> ) <sub>3</sub> •5H <sub>2</sub> O  | TEMPO             | 20/5        | 1,4-dioxane        | 73                     |
| 14              | Bi(NO <sub>3</sub> ) <sub>3</sub> •5H <sub>2</sub> O  | TEMPO             | 10/1        | 1,4-dioxane        | 60                     |
| 15              | Bi(NO <sub>3</sub> ) <sub>3</sub> •5H <sub>2</sub> O  | TEMPO             | 10/10       | 1,4-dioxane        | 76                     |
| 16              | Bi(NO <sub>3</sub> ) <sub>3</sub> •5H <sub>2</sub> O  | TEMPO             | 10/20       | 1,4-dioxane        | 78                     |
| 17              | Bi(NO <sub>3</sub> ) <sub>3</sub> •5H <sub>2</sub> O  | TEMPO             | 10/5        | DMSO               | n.r                    |
| 18              | Bi(NO <sub>3</sub> ) <sub>3</sub> •5H <sub>2</sub> O  | TEMPO             | 10/5        | DCM                | 39                     |
| 19              | Bi(NO <sub>3</sub> ) <sub>3</sub> •5H <sub>2</sub> O  | TEMPO             | 10/5        | Toluene            | 44                     |
| 20              | Bi(NO <sub>3</sub> ) <sub>3</sub> •5H <sub>2</sub> O  | TEMPO             | 10/5        | CH <sub>3</sub> CN | 42                     |
| 21              | Bi(NO <sub>3</sub> ) <sub>3</sub> •5H <sub>2</sub> O  | TEMPO             | 10/5        | DCE                | 75                     |
| 22              | Bi(NO <sub>3</sub> ) <sub>3</sub> •5H <sub>2</sub> O  | TEMPO             | 10/5        | CHCl <sub>3</sub>  | 91                     |
| 23              | ---                                                   | TEMPO             | 10/5        | 1,4-dioxane        | n.r                    |
| 24              | Bi(NO <sub>3</sub> ) <sub>3</sub> •5H <sub>2</sub> O  | ---               | 10/5        | 1,4-dioxane        | n.r                    |
| 25              | Bi(NO <sub>3</sub> ) <sub>3</sub> •5H <sub>2</sub> O  | TEMPO             | 10/5        | ---                | 37                     |
| 26 <sup>c</sup> | Bi(NO <sub>3</sub> ) <sub>3</sub> •5H <sub>2</sub> O  | TEMPO             | 10/5        | 1,4-dioxane        | 71                     |

<sup>a</sup> Reaction conditions: **1aa** (0.2 mmol), catalyst (10 mol%), co-catalyst (5 mol%), solvent (0.1 mol/L) under O<sub>2</sub> at 50 °C for 24 h. <sup>b</sup> NMR yield. <sup>c</sup> Under air.

### 3. General procedure for the aerobic oxidation of alcohols.

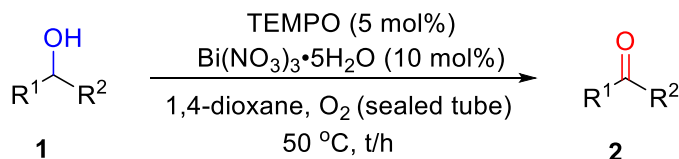

**Standard conditions:** A 10 mL reaction vessel was charged with alcohol **1** (0.2 mmol, 1.0 equiv), TEMPO (1.6 mg, 0.01 mmol, 5 mol %), Bi(NO<sub>3</sub>)<sub>3</sub>·5H<sub>2</sub>O (9.7 mg, 0.02 mmol, 10 mol%) and 1,4-dioxane (2.0 mL). The atmosphere was exchanged by applying vacuum and backfilling with dioxygen (this process was carried out three times). The solution was stirred at 50 °C for identified reaction time under an oxygen atmosphere. After completion of the reaction (monitored by TLC or GC-MS), the crude mixture was diluted with ethyl acetate (5.0 mL), filtered, and concentrated under reduced pressure to remove volatile components. Then, the crude products were obtained and used for NMR record. Column chromatography was performed using silica gel (200-300 mesh) or thin layer chromatography was performed using silica gel (GF254) to give pure product **2** if the crude <sup>1</sup>H NMR contains impurities (petroleum ether/ethyl acetate, 20 : 1).

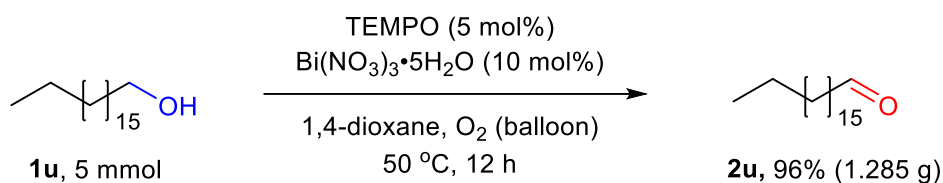

**Gram-scale experiment (a):** A 50 mL reaction vessel was charged with octadecan-1-ol **1u** (1.353 g, 5.0 mmol, 1.0 equiv), TEMPO (40 mg, 0.25 mmol, 5 mol %), Bi(NO<sub>3</sub>)<sub>3</sub>·5H<sub>2</sub>O (242 mg, 0.5 mmol, 10 mol%) and 1,4-dioxane (20 mL). The atmosphere was exchanged by applying vacuum and backfilling with dioxygen and the vessel was connected with an oxygen balloon. The solution was stirred at 50 °C for 12 h. After completion, the crude mixture was diluted with ethyl acetate (20 mL), filtered, and concentrated under reduced pressure to remove volatile components. Column chromatography was performed using silica gel (200-300 mesh, petroleum ether/ethyl acetate, 20 : 1) to give pure product **2u** as white solid (96%, 1.285 g).

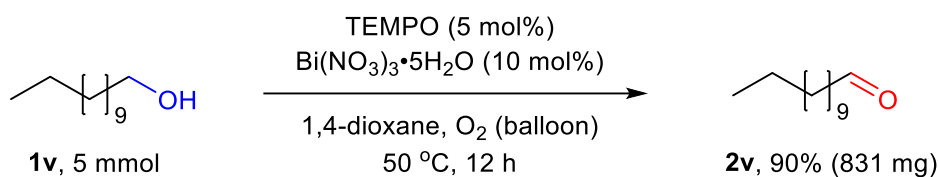

**Gram-scale experiment (b):** A 50 mL reaction vessel was charged with octadecan-1-ol **1v** (1.13 mL, 5.0 mmol, 1.0 equiv), TEMPO (40 mg, 0.25 mmol, 5 mol %),  $\text{Bi}(\text{NO}_3)_3 \cdot 5\text{H}_2\text{O}$  (242 mg, 0.5 mmol, 10 mol%) and 1,4-dioxane (20 mL). The atmosphere was exchanged by applying vacuum and backfilling with dioxygen and the vessel was connected with an oxygen balloon. The solution was stirred at 50 °C for 12 h. After completion, the crude mixture was diluted with ethyl acetate (20 mL), filtered, and concentrated under reduced pressure to remove volatile components. Column chromatography was performed using silica gel (200-300 mesh, petroleum ether/ethyl acetate, 20 : 1) to give pure product **2v** as colorless oil (90%, 831 mg).

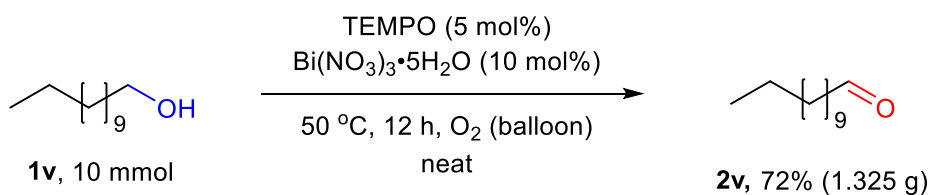

**Gram-scale experiment (c):** A 50 mL reaction vessel was charged with octadecan-1-ol **1v** (2.26 mL, 10 mmol, 1.0 equiv), TEMPO (80 mg, 0.5 mmol, 5 mol %),  $\text{Bi}(\text{NO}_3)_3 \cdot 5\text{H}_2\text{O}$  (484 mg, 0.5 mmol, 10 mol%). The atmosphere was exchanged by applying vacuum and backfilling with dioxygen and the vessel was connected with an oxygen balloon. The solution was stirred at 50 °C for 12 h. After completion, the crude mixture was diluted with ethyl acetate (20 mL), filtered, and concentrated under reduced pressure to remove volatile components. Column chromatography was performed using silica gel (200-300 mesh, petroleum ether/ethyl acetate, 20 : 1) to give pure product **2v** as colorless oil (72%, 1.325 g).

#### 4. Metrics calculations

E-factor were calculated using Waste Mass/Product Mass.

(a) *Adv. Synth. Catal.*, **2010**, 352, 113–118.

E-factor:  $[12.56 \text{ (sol.)} + 0.511 \text{ (SM1)} + 0.032 \text{ (Cat)} + 0.0276 \text{ (additive)} + 0.0406 \text{ (additive)} - 0.466 \text{ (Pro)}] / 0.466 = 27.3$

(b) *RSC Adv.*, **2016**, 6, 35008–35013.

E-factor:  $[31.44 \text{ (sol.)} + 0.65 \text{ (SM1)} + 0.048 \text{ (Cat)} + 0.088 \text{ (Cat)} + 0.04 \text{ (additive)} - 0.609 \text{ (Pro)}] / 0.609 = 52$

(c) *Org. Process Res. Dev.* **2019**, 23, 825–8353.

E-factor:  $[376.8 \text{ (sol.)} + 18.82 \text{ (SM1)} + 2.02 \text{ (Cat1)} + 1.72 \text{ (Cat2)} + 0.585 \text{ (Cat3)} - 16.30 \text{ (Pro)}] / 16.30 = 23.5$

(d) **Our system in neat:**

E-factor:  $[1.863 \text{ (SM1)} + 0.485 \text{ (Cat)} + 0.078 \text{ (co-Cat)} - 1.327] / 1.327 = 0.83$

## 5. competition reaction

A 10 mL reaction vessel was charged with 1-pentanol (0.1 mmol), 2-octanol (0.1 mmol), TEMPO (1.6 mg, 0.01 mmol, 5 mol %), Bi(NO<sub>3</sub>)<sub>3</sub>•5H<sub>2</sub>O (9.7 mg, 0.02 mmol, 10 mol%) and CDCl<sub>3</sub> (2.0 mL). The atmosphere was exchanged by applying vacuum and backfilling with dioxygen (this process was carried out three times). The solution was stirred at 50 °C for 6 h. After completion, the crude mixture was directed used for <sup>1</sup>H NMR, which suggests the molar ratio of corresponding pentanal (**2au**) and octan-2-one (**2av**) to be 1.5 : 1.

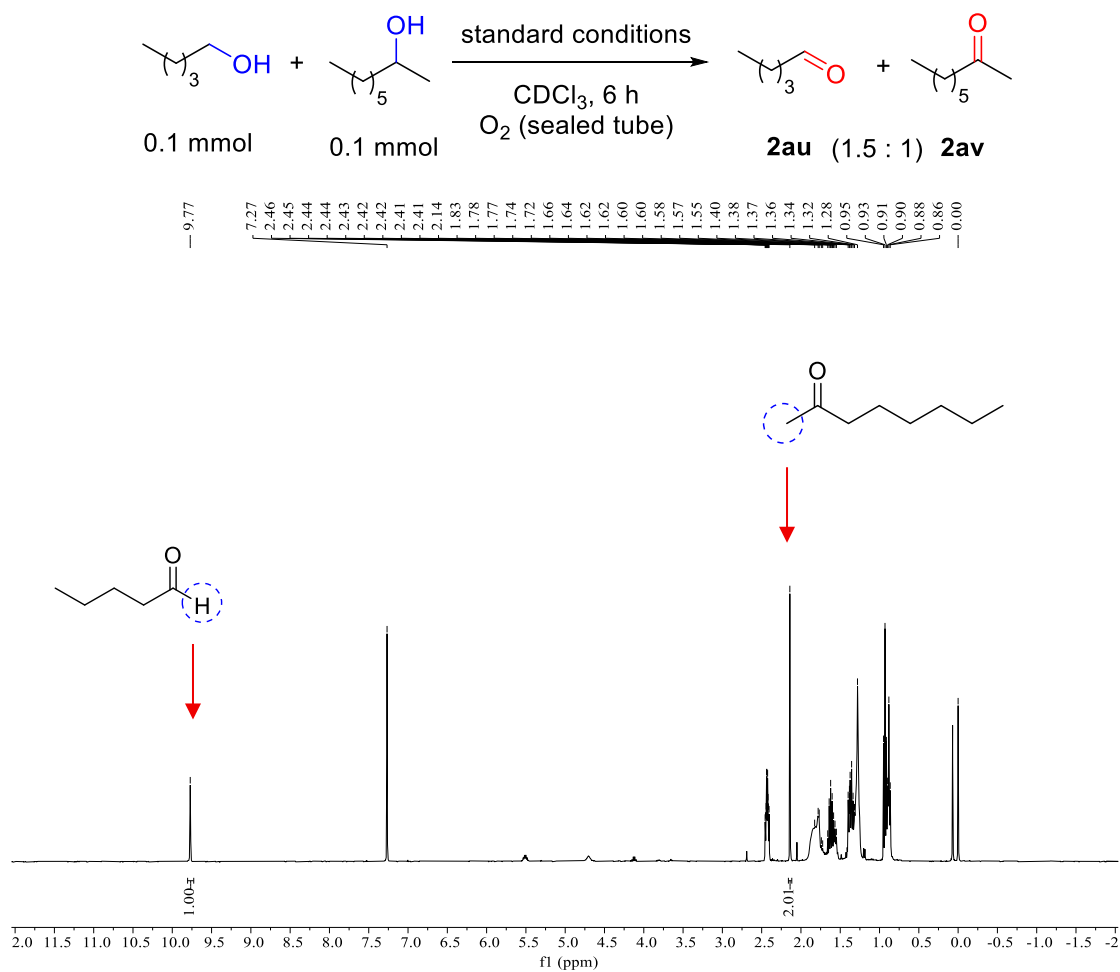

## 6. Characterization data of products

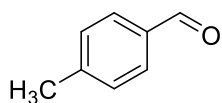

**4-methylbenzaldehyde (2a, CAS: 104-87-0)**<sup>[1]</sup>, by silica gel column chromatography (petroleum ether/ethyl acetate = 20:1), 23.8 mg, 99% yield, colorless liquid. <sup>1</sup>H NMR (400 MHz, CDCl<sub>3</sub>, ppm) δ 9.95 (s, 1H), 7.77 (d, *J* = 8.1 Hz, 2H), 7.32 (d, *J* = 7.9 Hz, 2H), 2.43 (s, 3H).

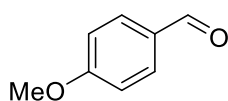

**4-methoxybenzaldehyde (2b, CAS: 123-11-5)**<sup>[1]</sup>, by silica gel column chromatography (petroleum ether/ethyl acetate = 20:1), 26.9 mg, 99% yield, colorless liquid. <sup>1</sup>H NMR (400 MHz, CDCl<sub>3</sub>, ppm) δ 9.87 (s, 1H), 7.83 (d, *J* = 8.7 Hz, 2H), 6.99 (d, *J* = 8.7 Hz, 2H), 3.88 (s, 3H).

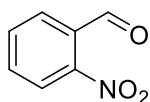

**2-nitrobenzaldehyde (2c, CAS: 552-89-6)**<sup>[2]</sup>, by silica gel column chromatography (petroleum ether/ethyl acetate = 20:1), 29.9 mg, 99% yield, yellow solid. <sup>1</sup>H NMR (400 MHz, CDCl<sub>3</sub>, ppm) δ 10.41 (s, 1H), 8.11 (dd, *J* = 7.7, 1.6 Hz, 1H), 7.94 (dd, *J* = 7.3, 1.9 Hz, 1H), 7.82 - 7.72 (m, 2H).

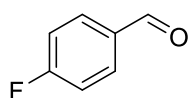

**4-fluorobenzaldehyde (2d, CAS: 459-57-4)**<sup>[3]</sup>, by silica gel column chromatography (petroleum ether/ethyl acetate = 20:1), 24.6 mg, 99% yield, colorless liquid. <sup>1</sup>H NMR (400 MHz, CDCl<sub>3</sub>, ppm) δ 9.96 (s, 1H), 7.93 – 7.87 (m, 2H), 7.24 – 7.16 (m, 2H).

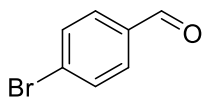

**4-bromobenzaldehyde (2f, CAS: 1122-91-4)**<sup>[4]</sup>, by silica gel column chromatography (petroleum ether/ethyl acetate = 20:1), 36.6 mg, 99% yield, white solid. <sup>1</sup>H NMR (400 MHz, CDCl<sub>3</sub>, ppm) δ 9.96 (s, 1H), 7.74 (d, *J* = 8.5 Hz, 2H), 7.67 (d, *J* = 8.4 Hz, 2H).

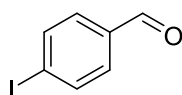

**4-iodobenzaldehyde (2g, CAS: 15164-44-0)**<sup>[4]</sup>, by silica gel column chromatography (petroleum ether/ethyl acetate = 20:1), 45.9 mg, 99% yield, yellow solid. <sup>1</sup>H NMR (400 MHz, CDCl<sub>3</sub>, ppm) δ 9.94 (s, 1H), 7.90 (d, *J* = 8.4 Hz, 2H), 7.58 (d, *J* = 8.3 Hz, 2H).

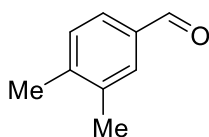

**3,4-dimethylbenzaldehyde (2h, CAS: 5973-71-7)**<sup>[5]</sup>, by silica gel column chromatography (petroleum ether/ethyl acetate = 20:1), 26.6 mg, 99% yield, colorless liquid. <sup>1</sup>H NMR (400 MHz, CDCl<sub>3</sub>, ppm) δ 9.92 (s, 1H), 7.63 (s, 1H), 7.60 (d, *J* = 8.3 Hz, 1H), 7.28 (d, *J* = 7.7 Hz, 1H), 2.33 (s, 3H), 2.32 (s, 3H).

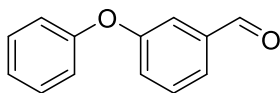

**3-phenoxybenzaldehyde (2i, CAS: 39515-51-0)**<sup>[6]</sup>, by silica gel column chromatography (petroleum ether/ethyl acetate = 20:1), 39.2 mg, 99% yield, yellow liquid. <sup>1</sup>H NMR (400 MHz, CDCl<sub>3</sub>, ppm) δ 9.95 (s, 1H), 7.59 (d, *J* = 7.4 Hz, 1H), 7.49 (t, *J* = 7.8 Hz, 1H), 7.46 (s, 1H), 7.38 (t, *J* = 7.6 Hz, 2H), 7.30 – 7.26 (m, 1H), 7.16 (t, *J* = 7.4 Hz, 1H), 7.03 (d, *J* = 7.5 Hz, 2H).

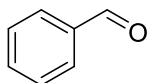

**benzaldehyde (2j, CAS: 100-52-7)**<sup>[11]</sup>, by silica gel column chromatography (petroleum ether/ethyl acetate = 20:1), 21.0 mg, 99% yield, colorless liquid. <sup>1</sup>H NMR (400 MHz, CDCl<sub>3</sub>, ppm) δ 10.01 (s, 1H), 7.88 (d, *J* = 6.8 Hz, 2H), 7.66 - 7.60 (m, 1H), 7.53 (t, *J* = 7.5 Hz, 2H).

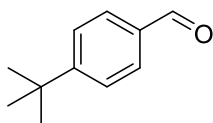

**4-(tert-butyl)benzaldehyde (2k, CAS: 939-97-9)**<sup>[7]</sup>, by silica gel column chromatography (petroleum ether/ethyl acetate = 20:1), 31.7 mg, 99% yield, colorless liquid. <sup>1</sup>H NMR (400 MHz, CDCl<sub>3</sub>, ppm) δ 9.97 (s, 1H), 7.81 (d, *J* = 8.4 Hz, 2H), 7.54 (d, *J* = 8.4 Hz, 2H), 1.34 (s, 9H).

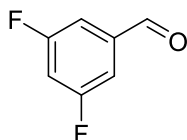

**3,5-difluorobenzaldehyde (2l, CAS: 32085-88-4)**<sup>[8]</sup>, by silica gel column chromatography (petroleum ether/ethyl acetate = 20:1), 28.1 mg, 99% yield, colorless liquid. <sup>1</sup>H NMR (400 MHz, CDCl<sub>3</sub>, ppm) δ 9.94 (s, 1H), 7.40 (d, *J* = 4.9 Hz, 2H), 7.08 (tt, *J* = 8.4, 2.2 Hz, 1H).

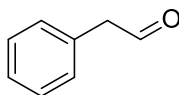

**2-phenylacetaldehyde (2m, CAS: 122-78-1)**<sup>[9]</sup>, by silica gel column chromatography (petroleum ether/ethyl acetate = 20:1), 19.7 mg, 82% yield, colorless liquid. <sup>1</sup>H NMR (400 MHz, CDCl<sub>3</sub>, ppm) δ 9.74 (t, *J* = 2.4 Hz, 1H), 7.37 (t, *J* = 7.3 Hz, 2H), 7.31 (d, *J* = 7.2 Hz, 1H), 7.21 (d, *J* = 7.1 Hz, 2H), 3.68 (d, *J* = 2.4 Hz, 2H).

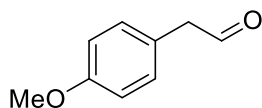

**2-(4-methoxyphenyl)acetaldehyde (2n, CAS: 5703-26-4)**<sup>[10]</sup>, by silica gel column chromatography (petroleum ether/ethyl acetate = 20:1), 24.2 mg, 80% yield, colorless liquid. <sup>1</sup>H NMR (400 MHz, CDCl<sub>3</sub>, ppm) δ 9.72 (t, *J* = 2.3 Hz, 1H), 7.13 (d, *J* = 8.6 Hz, 2H), 6.91 (d, *J* = 8.6 Hz, 2H), 3.81 (s, 3H), 3.63 (d, *J* = 2.3 Hz, 2H).

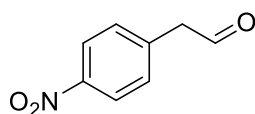

**2-(4-nitrophenyl)acetaldehyde (2o, CAS: 1460-05-5)**<sup>[11]</sup>, by silica gel column chromatography (petroleum ether/ethyl acetate = 20:1), 15.9 mg, 48% yield, yellow liquid. <sup>1</sup>H NMR (400 MHz, CDCl<sub>3</sub>, ppm) δ 9.81 (t, *J* = 1.7 Hz, 1H), 8.22 (d, *J* = 8.7 Hz, 2H), 7.39 (d, *J* = 8.6 Hz, 2H), 3.87 (d, *J* = 1.7 Hz, 2H).

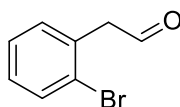

**2-(2-bromophenyl)acetaldehyde (2p, CAS: 27200-79-9)**<sup>[9]</sup>, by silica gel column chromatography (petroleum ether/ethyl acetate = 20:1), 28.1 mg, 71% yield, white solid. <sup>1</sup>H NMR (400 MHz, CDCl<sub>3</sub>, ppm) δ 9.75 (s, 1H), 7.61 (d, *J* = 8.0 Hz, 1H), 7.34 – 7.21 (m, 1H), 7.24 – 7.21 (m, 1H), 7.21 – 7.14 (m, 1H), 3.86 (d, *J* = 1.5 Hz, 2H).

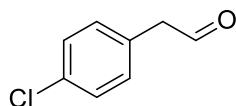

**2-(4-chlorophenyl)acetaldehyde (2q, CAS: 4251-65-4)**<sup>[12]</sup>, by silica gel column chromatography (petroleum ether/ethyl acetate = 20:1), 21.6 mg, 70% yield, colorless liquid. <sup>1</sup>H NMR (400 MHz, CDCl<sub>3</sub>, ppm) δ 9.73 (t, *J* = 2.0 Hz, 1H), 7.33 (d, *J* = 8.4 Hz, 2H), 7.14 (d, *J* = 8.3 Hz, 2H), 3.67 (d, *J* = 2.1 Hz, 2H).

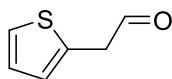

**2-(thiophen-2-yl)acetaldehyde (2r, CAS: 15022-15-8)**<sup>[10]</sup>, by silica gel column chromatography (petroleum ether/ethyl acetate = 20:1), 22.7 mg, 90% yield, yellow liquid. <sup>1</sup>H NMR (400 MHz, CDCl<sub>3</sub>, ppm) δ 9.73 (t, *J* = 2.1 Hz, 1H), 7.27 (dd, *J* = 5.1, 1.2 Hz, 1H), 7.03 (dd, *J* = 5.2, 3.4 Hz, 1H), 6.94 (d, *J* = 3.2 Hz, 1H), 3.88 (d, *J* = 2.1 Hz, 2H).

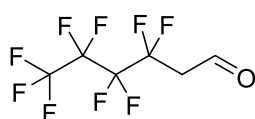

**3,3,4,4,5,5,6,6,6-nonafluorohexanal (2.2s)**<sup>[13]</sup>, by silica gel column chromatography (petroleum ether/ethyl acetate = 20:1), 37.2 mg, 71% yield, colorless liquid. <sup>1</sup>H NMR (400 MHz, CDCl<sub>3</sub>, ppm) δ 9.80 (s, 1H), 3.15 (t, *J* = 18.2 Hz, 2H).

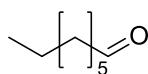

**octanal (2t, CAS: 124-13-0)**<sup>[6]</sup>, by silica gel column chromatography (petroleum ether/ethyl acetate = 20:1), 21.8 mg, 85% yield, colorless liquid. <sup>1</sup>H NMR (400 MHz, CDCl<sub>3</sub>, ppm) δ 9.75 (s, 1H), 2.41 (td, *J* = 7.4, 1.9 Hz, 2H), 1.61 (t, *J* = 7.1 Hz, 2H), 1.33 – 1.24 (m, 8H), 0.86 (t, *J* = 6.5 Hz, 3H).

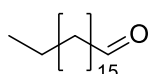

**stearylaldehyde (2u, CAS: 638-66-4)**<sup>[14]</sup>, by silica gel column chromatography (petroleum ether/ethyl acetate = 20:1), 51.0 mg, 95% yield, white solid. <sup>1</sup>H NMR (400 MHz, CDCl<sub>3</sub>, ppm) δ 9.75 (s, 1H), 2.40 (td, *J* = 7.4, 1.9 Hz, 2H), 1.61 (t, *J* = 7.1 Hz, 2H), 1.30 – 1.23 (m, 28H), 0.86 (t, *J* = 6.7 Hz, 3H).

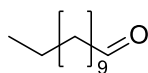

**dodecanal (2v, CAS: 112-54-9)**<sup>[7]</sup>, by silica gel column chromatography (petroleum ether/ethyl acetate = 20:1), 33.2 mg, 90% yield, colorless liquid. <sup>1</sup>H NMR (400 MHz, CDCl<sub>3</sub>, ppm) δ 9.79 (s, 1 H), 2.44 (td, *J* = 7.3, 1.71 Hz, 2 H), 1.65 (t, *J* = 7.1 Hz, 2 H), 1.40 – 1.14 (m, 16 H), 0.90 (t, *J* = 6.9 Hz, 3 H).

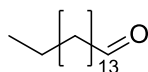

**palmitaldehyde (2w, CAS: 629-80-1)**<sup>[14]</sup>, by silica gel column chromatography (petroleum ether/ethyl acetate = 20:1), 45.2 mg, 94% yield, white solid. <sup>1</sup>H NMR (400 MHz, CDCl<sub>3</sub>, ppm) δ 9.74 (s, 1H), 2.40 (td, *J* = 7.4, 1.9 Hz, 2H), 1.61 (t, *J* = 7.0 Hz, 2H), 1.30 – 1.20 (m, 24H), 0.86 (t, *J* = 6.7 Hz, 3H).

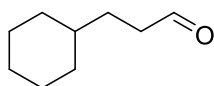

**3-cyclohexylpropanal (2x, CAS: 4361-28-8)**<sup>[7]</sup>, by silica gel column chromatography (petroleum ether/ethyl acetate = 20:1), 25.5 mg, 91% yield, colorless liquid. <sup>1</sup>H NMR (400 MHz, CDCl<sub>3</sub>, ppm) δ 9.75 (s, 1H), 2.42 (td, *J* = 8.2, 7.8, 1.9 Hz, 2H), 1.72 – 1.63 (m, 5H), 1.50 (q, *J* = 7.3 Hz, 2H), 1.27 – 1.12 (m, 4H), 0.93 – 0.80 (m, 2H).

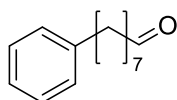

**8-phenyloctanal (2y)**<sup>[15]</sup>, by silica gel column chromatography (petroleum ether/ethyl acetate = 20:1), 28.4 mg, 94% yield, colorless oil. <sup>1</sup>H NMR (400 MHz, CDCl<sub>3</sub>, ppm) δ 9.75 (t, *J* = 1.7 Hz, 1H), 7.31 - 7.23 (m, 2H), 7.21 - 7.13 (m, 3H), 2.59 (t, *J* = 7.6 Hz, 2H), 2.41 (td, *J* = 7.3, 1.9 Hz, 2H), 1.65 - 1.56 (m, 4H), 1.33 (d, *J* = 2.3 Hz, 6H).

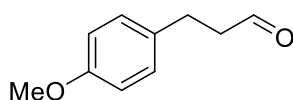

**3-(4-methoxyphenyl)propanal (2z, CAS: 20401-88-1)**<sup>[16]</sup>, by silica gel column chromatography (petroleum ether/ethyl acetate = 20:1), 31.2 mg, 95% yield, colorless liquid. <sup>1</sup>H NMR (400 MHz, CDCl<sub>3</sub>, ppm) δ 9.80 (s, 1H), 7.10 (d, *J* = 8.6 Hz, 2H), 6.82 (d, *J* = 8.6 Hz, 2H), 3.77 (s, 3H), 2.89 (t, *J* = 7.5 Hz, 2H), 2.74 (t, *J* = 7.4 Hz, 2H).

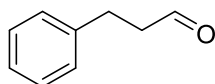

**3-phenylpropanal (2aa, CAS: 104-53-0)**<sup>[11]</sup>, by silica gel column chromatography (petroleum ether/ethyl acetate = 20:1), 24.1 mg, 91% yield, colorless liquid. <sup>1</sup>H NMR (400 MHz, CDCl<sub>3</sub>, ppm) δ 9.82 (s, 1H), 7.29 (t, *J* = 7.4 Hz, 2H), 7.23 – 7.16 (m, 3H), 2.95 (t, *J* = 7.6 Hz, 2H), 2.78 (t, *J* = 7.9 Hz, 2H).

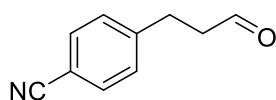

**4-(3-oxopropyl)benzonitrile (2ab, CAS: 136295-53-9)**<sup>[17]</sup>, by silica gel column chromatography (petroleum ether/ethyl acetate = 20:1), 29.3 mg, 92% yield, colorless liquid. <sup>1</sup>H NMR (400 MHz, CDCl<sub>3</sub>, ppm) δ 9.81 (s, 1H), 7.58 (d, *J* = 8.2 Hz, 2H), 7.30 (d, *J* = 7.8 Hz, 2H), 3.00 (t, *J* = 7.4 Hz, 2H), 2.82 (t, *J* = 7.3 Hz, 2H).

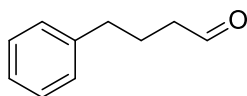

**4-phenylbutanal (2ac, CAS: 18328-11-5)**<sup>[17]</sup>, by silica gel column chromatography (petroleum ether/ethyl acetate = 20:1), 28.1 mg, 95% yield, colorless liquid. <sup>1</sup>H NMR (400 MHz, CDCl<sub>3</sub>, ppm) δ 9.75 (s, 1H), 7.29 (t, *J* = 7.4 Hz, 2H), 7.22 – 7.15 (m, 3H), 2.65 (t, *J* = 7.6 Hz, 2H), 2.45 (td, *J* = 7.3, 1.6 Hz, 2H), 1.96 (p, *J* = 7.4 Hz, 2H).

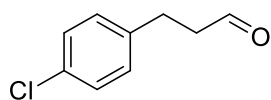

**3-(4-chlorophenyl)propanal (2ad, CAS: 75677-02-0)<sup>[18]</sup>**, by silica gel column chromatography (petroleum ether/ethyl acetate = 20:1), 30.2 mg, 90% yield, colorless liquid. <sup>1</sup>H NMR (400 MHz, CDCl<sub>3</sub>, ppm) δ 9.80 (s, 1H), 7.24 (d, *J* = 8.4 Hz, 2H), 7.11 (d, *J* = 8.4 Hz, 2H), 2.91 (t, *J* = 7.4 Hz, 2H), 2.76 (t, *J* = 7.5 Hz, 2H).

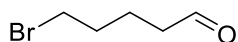

**5-bromopentanal (2ae, CAS: 1191-30-6)<sup>[19]</sup>**, by silica gel column chromatography (petroleum ether/ethyl acetate = 20:1), 26.6 mg, 81% yield, colorless liquid. <sup>1</sup>H NMR (400 MHz, CDCl<sub>3</sub>, ppm) δ 9.78 (t, *J* = 1.5 Hz, 1H), 3.42 (t, *J* = 6.5 Hz, 2H), 2.49 (td, *J* = 7.1, 1.5 Hz, 2H), 1.93 – 1.85 (m, 2H), 1.84 – 1.76 (m, 2H).

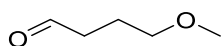

**4-methoxybutanal (2af, CAS: 21071-24-9)<sup>[20]</sup>**, by silica gel column chromatography (petroleum ether/ethyl acetate = 20:1), 16.3 mg, 80% yield, colorless liquid. <sup>1</sup>H NMR (400 MHz, CDCl<sub>3</sub>, ppm) δ 9.76 (s, 1H), 3.39 (t, *J* = 6.1 Hz, 2H), 3.30 (s, 3H), 2.51 (t, *J* = 7.0 Hz, 2H), 1.89 (p, *J* = 6.6 Hz, 2H).

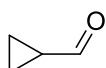

**cyclopropanecarbaldehyde (2ag, CAS: 1489-69-6)<sup>[8]</sup>**, by silica gel column chromatography (petroleum ether/ethyl acetate = 20:1), 10.5 mg, 75% yield, colorless liquid. <sup>1</sup>H NMR (400 MHz, CDCl<sub>3</sub>, ppm) δ 8.89 (d, *J* = 5.9 Hz, 1H), 1.87 – 1.78 (m, 1H), 1.09 – 1.04 (m, 4H).

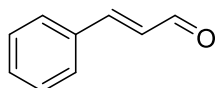

**cinnamaldehyde (2ah, CAS: 104-55-2)<sup>[1]</sup>**, by silica gel column chromatography (petroleum ether/ethyl acetate = 20:1), 16.4 mg, 62% yield, yellow liquid. <sup>1</sup>H NMR (400 MHz, CDCl<sub>3</sub>, ppm) δ 9.69 (d, *J* = 7.7 Hz, 1H), 7.58 – 7.52 (m, 2H), 7.47 (d, *J* =

16.0 Hz, 1H), 7.44 – 7.38 (m, 3H), 6.71 (dd,  $J = 15.9, 7.7$  Hz, 1H).

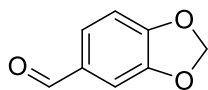

**Piperonal (2ai, CAS: 120-57-0)**<sup>[1]</sup>, by silica gel column chromatography (petroleum ether/ethyl acetate = 20:1), 28.5 mg, 95% yield, white solid. <sup>1</sup>H NMR (400 MHz, CDCl<sub>3</sub>, ppm)  $\delta$  9.79 (s, 1H), 7.39 (dd,  $J = 7.9, 1.6$  Hz, 1H), 7.31 (d,  $J = 1.6$  Hz, 1H), 6.91 (d,  $J = 8.0$  Hz, 1H), 6.06 (s, 2H).

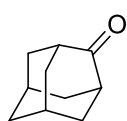

**2-adamantane ketone (2aj, CAS: 700-58-3)**, by silica gel column chromatography (petroleum ether/ethyl acetate = 20:1), 29.7 mg, 99% yield, white solid. <sup>1</sup>H NMR (400 MHz, CDCl<sub>3</sub>, ppm)  $\delta$  2.52 (s, 2H), 2.10 – 2.03 (m, 4H), 2.02 – 1.93 (m, 6H), 1.91 (s, 2H); <sup>13</sup>C NMR (100 MHz, CDCl<sub>3</sub>)  $\delta$  218.7, 47.0, 39.3, 36.3, 27.4.

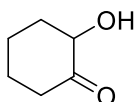

**2-hydroxycyclohexan-1-one (2ak, CAS: 533-60-8)**, by silica gel column chromatography (petroleum ether/ethyl acetate = 20:1), 21.4 mg, 94% yield, white solid. <sup>1</sup>H NMR (400 MHz, CDCl<sub>3</sub>, ppm)  $\delta$  4.11 (dd,  $J = 11.4, 7.2$  Hz, 1H), 2.55 (ddt,  $J = 13.6, 3.9, 1.7$  Hz, 1H), 2.45 (ddq,  $J = 12.7, 6.1, 2.9$  Hz, 1H), 2.35 (tdd,  $J = 13.7, 6.4, 1.5$  Hz, 1H), 2.10 (ddt,  $J = 12.4, 5.9, 2.7$  Hz, 1H), 1.88 (dd,  $J = 13.4, 3.1$  Hz, 1H), 1.72 (tt,  $J = 13.2, 3.2$  Hz, 1H), 1.67 - 1.56 (m, 1H), 1.49 (td,  $J = 12.6, 3.7$  Hz, 1H); <sup>13</sup>C NMR (100 MHz, CDCl<sub>3</sub>)  $\delta$  211.4, 75.4, 39.5, 36.7, 27.6, 23.4.

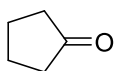

**cyclopentanone (2al, CAS: 120-92-3)**, by silica gel column chromatography

(petroleum ether/ethyl acetate = 20:1), 14.4 mg, 90% yield, colorless liquid.  $^1\text{H}$  NMR (400 MHz,  $\text{CDCl}_3$ , ppm)  $\delta$  2.18 – 2.11 (m, 4H), 1.98 - 1.91 (m, 4H);  $^{13}\text{C}$  NMR (100 MHz,  $\text{CDCl}_3$ )  $\delta$  220.9, 38.4, 23.2.

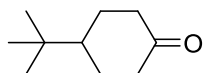

**4-(tert-butyl)cyclohexan-1-one (2am, CAS: 98-53-3)**<sup>[21]</sup>, by silica gel column chromatography (petroleum ether/ethyl acetate = 20:1), 28.0 mg, 91% yield, colorless liquid.  $^1\text{H}$  NMR (400 MHz,  $\text{CDCl}_3$ , ppm)  $\delta$  2.41 – 2.21 (m, 4H), 2.11 – 2.00 (m, 2H), 1.49 – 1.36 (m, 3H), 0.89 (s, 9H).

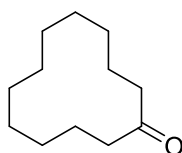

**cyclododecanone (2an, CAS: 830-13-7)**, by silica gel column chromatography (petroleum ether/ethyl acetate = 20:1), 34.6 mg, 95% yield, white solid.  $^1\text{H}$  NMR (400 MHz,  $\text{CDCl}_3$ , ppm)  $\delta$  2.49 – 2.40 (m, 4H), 1.74 – 1.65 (m, 4H), 1.32 – 1.21 (m, 14H);  $^{13}\text{C}$  NMR (100 MHz,  $\text{CDCl}_3$ )  $\delta$  213.1, 40.4, 24.7, 24.6, 24.2, 22.6, 22.3;  $^{13}\text{C}$  NMR (100 MHz,  $\text{CDCl}_3$ )  $\delta$  213.1, 40.4, 24.7, 24.6, 24.2, 22.6, 22.3.

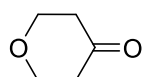

**tetrahydro-4H-pyran-4-one (2ao, CAS: 108-97-4)**<sup>[22]</sup>, by silica gel column chromatography (petroleum ether/ethyl acetate = 20:1), 19.0 mg, 95% yield, colorless liquid.  $^1\text{H}$  NMR (400 MHz,  $\text{CDCl}_3$ , ppm)  $\delta$  3.95 (t,  $J$  = 5.9 Hz, 4H), 2.48 (t,  $J$  = 5.9 Hz, 4H).

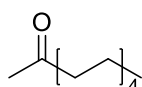

**undecan-2-one (2ap, CAS: 112-12-9)**, by silica gel column chromatography

(petroleum ether/ethyl acetate = 20:1), 28.9 mg, 85% yield, colorless liquid.  $^1\text{H}$  NMR (400 MHz,  $\text{CDCl}_3$ , ppm)  $\delta$  2.40 (t,  $J = 7.5$  Hz, 2H), 2.12 (s, 3H), 1.59 – 1.50 (m, 2H), 1.29 – 1.20 (m, 12H), 0.86 (t,  $J = 6.7$  Hz, 3H);  $^{13}\text{C}$  NMR (100 MHz,  $\text{CDCl}_3$ )  $\delta$  209.5, 43.8, 31.9, 29.9, 29.4 (2 C), 29.3, 29.2, 23.9, 22.7, 14.1;  $^{13}\text{C}$  NMR (100 MHz,  $\text{CDCl}_3$ )  $\delta$  209.5, 43.8, 31.9, 29.9, 29.4, 29.4, 29.3, 29.2, 23.9, 22.7, 14.1.

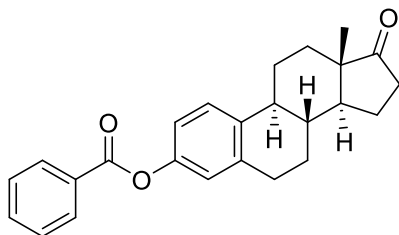

**Estrone benzoate (2aq, CAS: 2393-53-5)**, by silica gel column chromatography (petroleum ether/ethyl acetate = 20:1), 70.3 mg, 94% yield, white solid.  $^1\text{H}$  NMR (400 MHz,  $\text{CDCl}_3$ , ppm)  $\delta$  8.22 – 8.15 (m, 2H), 7.62 (t,  $J = 7.5$  Hz, 1H), 7.50 (t,  $J = 7.7$  Hz, 2H), 7.33 (d,  $J = 8.4$  Hz, 1H), 7.02 – 6.92 (m, 2H), 2.98 – 2.87 (m, 2H), 2.57 – 2.38 (m, 2H), 2.35 – 2.26 (m, 1H), 2.20 – 1.94 (m, 4H), 1.67 – 1.42 (m, 6H), 0.91 (s, 3H);  $^{13}\text{C}$  NMR (100 MHz,  $\text{CDCl}_3$ )  $\delta$  220.9, 165.5, 148.9, 138.1, 137.5, 133.6, 130.2, 129.7, 128.6, 126.5, 121.8, 118.9, 50.4, 48.0, 44.2, 38.0, 35.9, 31.6, 29.5, 26.4, 25.8, 21.6, 13.9.

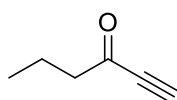

**hex-1-yn-3-one (2ar, CAS: 689-00-9)**, by silica gel column chromatography (petroleum ether/ethyl acetate = 20:1), 17.7 mg, 92% yield, colorless liquid.  $^1\text{H}$  NMR (400 MHz,  $\text{CDCl}_3$ , ppm)  $\delta$  3.19 (s, 1H), 2.56 (t,  $J = 7.3$  Hz, 2H), 1.76 – 1.64 (m, 2H), 0.94 (t,  $J = 7.4$  Hz, 3H);  $^{13}\text{C}$  NMR (100 MHz,  $\text{CDCl}_3$ )  $\delta$  187.6, 81.5, 78.3, 47.3, 17.3, 13.5.

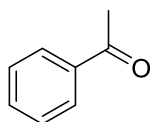

**acetophenone (2as, CAS: 98-86-2)**<sup>[14]</sup>, by silica gel column chromatography (petroleum ether/ethyl acetate = 20:1), 22.8 mg, 95% yield, colorless liquid. <sup>1</sup>H NMR (400 MHz, CDCl<sub>3</sub>, ppm) δ 7.96 (d, *J* = 7.2 Hz, 2H), 7.56 (t, *J* = 7.3 Hz, 1H), 7.46 (t, *J* = 7.7 Hz, 2H), 2.61 (s, 3H).

## 7. References

- [1] T F. Tobita, T. Yasukawa, Y. Yamashita and S. Kobayashi, *Catal. Sci. Technol.*, **2022**, *12*, 1043-1048.
- [2] S. A. Dake, R. S. Kulkarni, V. N. Kadam, S. S. Modani, J. J. Bhale, S. B. Tathe and R. P. Pawar, *Synth. Commun.*, **2009**, *39*, 3898-3904.
- [3] B.-T. Chen, K. V. Bukhryakov, R. Sougrat and V. O. Rodionov, *ACS Catal.*, **2015**, *5*, 1313-1317.
- [4] H. Yang, Y. Li, M. Jiang, J. Wang and H. Fu, *Chem. Eur. J.*, **2011**, *17*, 5652-5660.
- [5] H. Zhao, Q. Chen, L. Wei, Y. Jiang and M. Cai, *Tetrahedron*, **2015**, *71*, 8725-8731.
- [6] J.-A. Jiang, J.-L. Du, Z.-G. Wang, Z.-N. Zhang, X. Xu, G.-L. Zheng and Y.-F. Ji, *Tetrahedron Lett.*, **2014**, *55*, 1677-1681.
- [7] C. B. Kelly, M. A. Mercadante, R. J. Wiles and N. E. Leadbeater, *Org. Lett.* **2013**, *15*, 2222–2225
- [8] X. Wang, R. Liu, Y. Jin and X. Liang, *Chem. Eur. J.*, **2008**, *14*, 2679-2685.
- [9] S.-S. Meng, L.-R. Lin, X. Luo, H.-J. Lv, J.-L. Zhao and A. S. C. Chan, *Green Chem.*, **2019**, *21*, 6187-6193.
- [10] T. Pesnot, M. C. Gershater, J. M. Ward and H. C. Hailes, *Adv. Synth. Catal.*, **2012**, *354*, 2997-3008.
- [11] A. A. N. de Souza, N. S. Silva, A. V. Müller, A. S. Polo, T. J. Brocksom and K. T. de Oliveira, *J. Org. Chem.*, **2018**, *83*, 15077–15086.
- [12] S. Nakaoka, Y. Murakami, Y. Kataoka and Y. Ura, *Chem. Commun.*, **2016**, *52*, 335-338.
- [13] S. Calleja, P. Laurent and H. Blancou, *J. Fluorine Chem.*, **2005**, *126*, 1493-1495.
- [14] S. Ma, J. Liu, S. Li, B. Chen, J. Cheng, J. Kuang, Y. Liu, B. Wan, Y. Wang, J. Ye, Q. Yu, W. Yuan and S. Yu, *Adv. Synth. Catal.*, **2011**, *353*, 1005-1017.
- [15] K. Zhang, J. Wang, W. Chen, M. Li, S. Jin and Z. Zuo, *Green Chem.*, **2025**, *27*, 1023-1030
- [16] X. Xiao, S. Antony, G. Kohlhagen, Y. Pommier and M. Cushman, *J. Org. Chem.*, **2004**, *69*, 7495–7501
- [17] P. Colbon, J. Ruan, M. Purdie, K. Mulholland and J. Xiao, *Org. Lett.*, **2011**, *13*, 20, 5456–5459.
- [18] T. I. Houjeiry, S. L. Poe and D. T. McQuade, *Org. Lett.*, **2012**, *14*, 4394–4397.
- [19] H.-M. Huang, P. Bellotti, J. E. Erchinger, T. O. Paulisch and F. Glorius, *J. Am. Chem. Soc.*, **2022**, *144*, 1899–1909.
- [20] Q. Huang, E. Y. Rui, M. Cobbs, D. M. Dinh, H. J. Gukasyan, J. A. Lafontaine, S. Mehta, B. D. Patterson, D. A. Rewolinski, P. F. Richardson and M. P. Edwards, *J.*

*Med. Chem.* 2015, 58, 2821–2833.

[21] A. Porcheddu, F. Delogu, L. De Luca, C. Fattuoni and E. Colacino, *Beilstein J. Org. Chem.*, **2019**, 15, 1786–1794.

[22] Y. Xue and S. Wang, *J. Org. Chem.*, **2024**, 89, 4199–4204.

## 8. NMR Spectra of products

### 4-methylbenzaldehyde (2a)

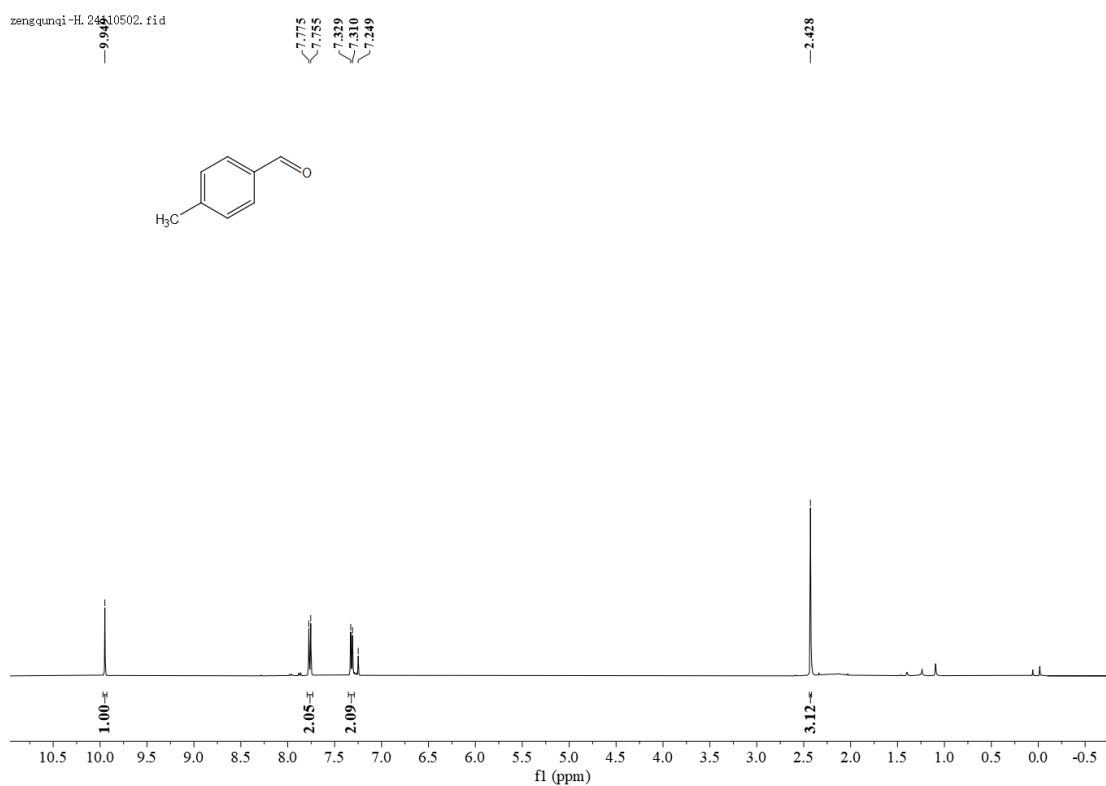

### 4-methoxybenzaldehyde (2b)

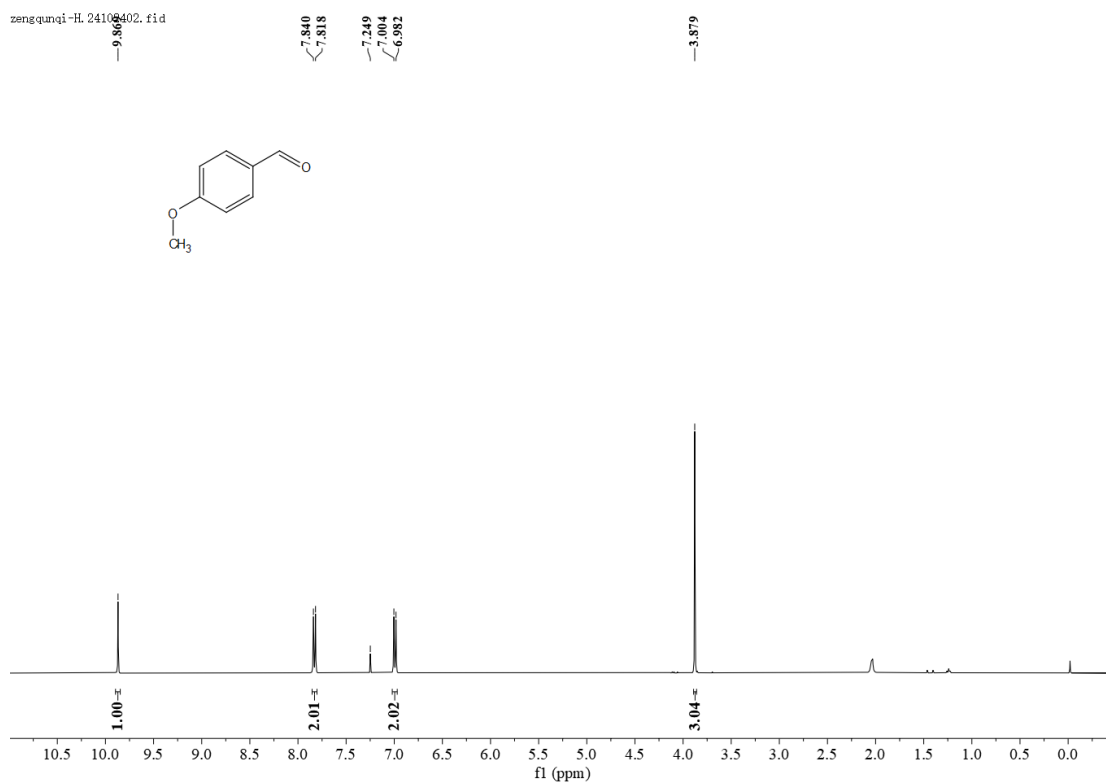

## 2-nitrobenzaldehyde (2c)

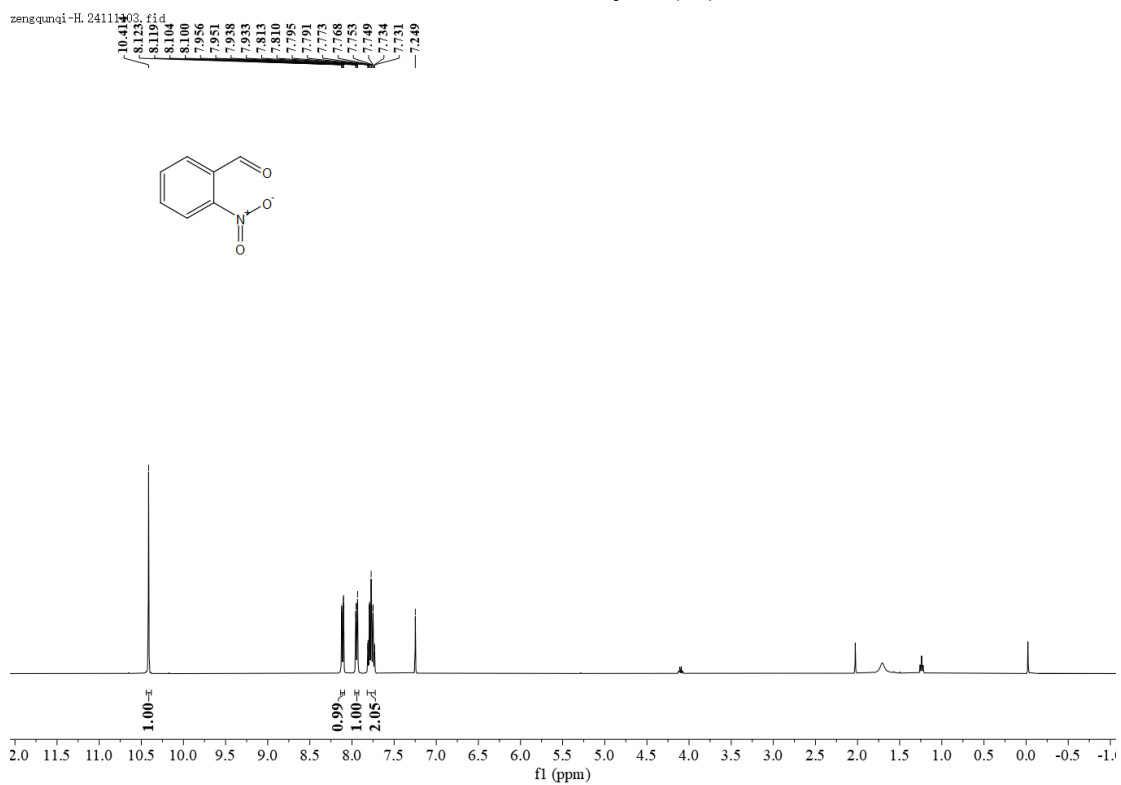

## 4-fluorobenzaldehyde (2d)

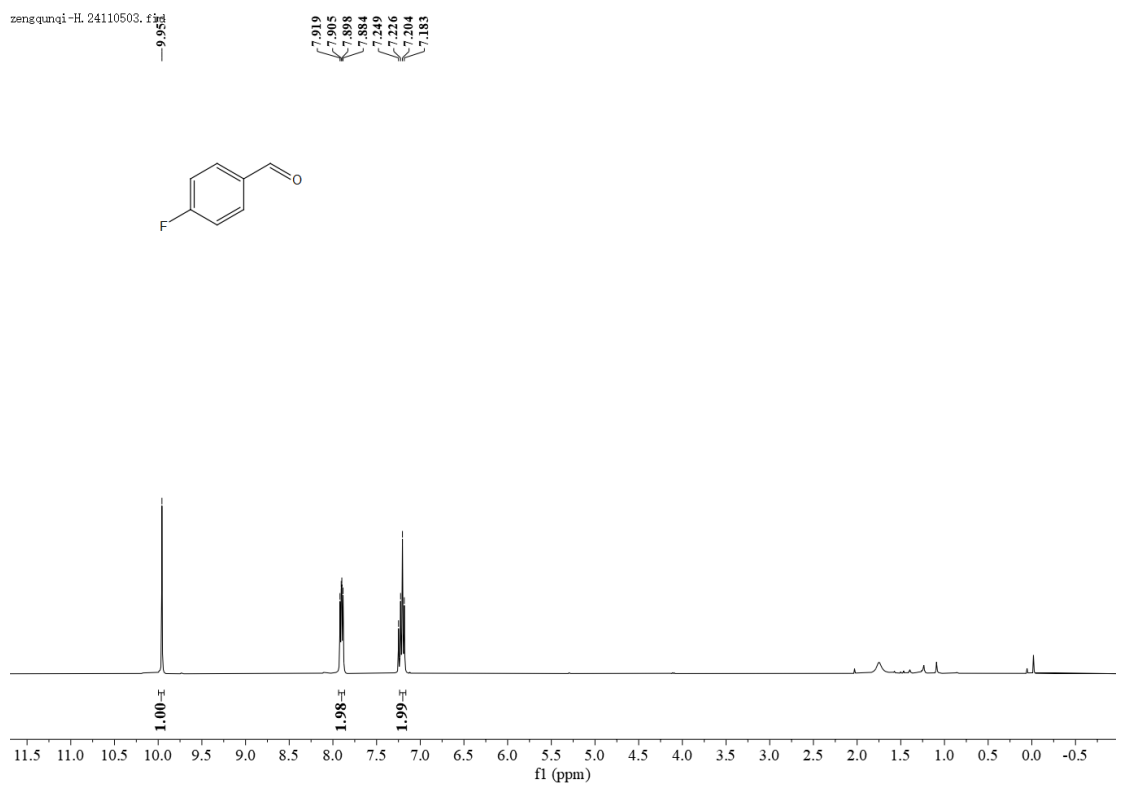

### 4-bromobenzaldehyde (2f)

zengqunqi-HL 24110504.fid

9.964  
7.748  
7.727  
7.685  
7.664  
7.249

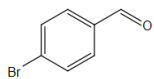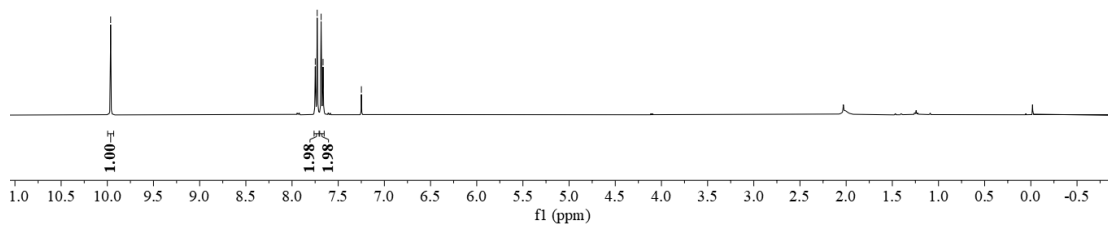

### 4-iodobenzaldehyde (2g)

zengqunqi-HL 241104104.fid

9.944  
7.913  
7.892  
7.588  
7.567  
7.249

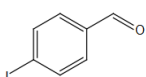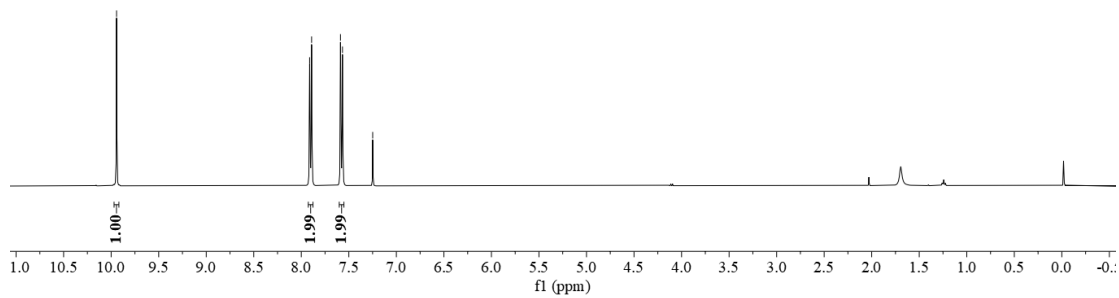

### 3,4-dimethylbenzaldehyde (2h)

zengqunqi-H. 24111101. f1d

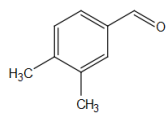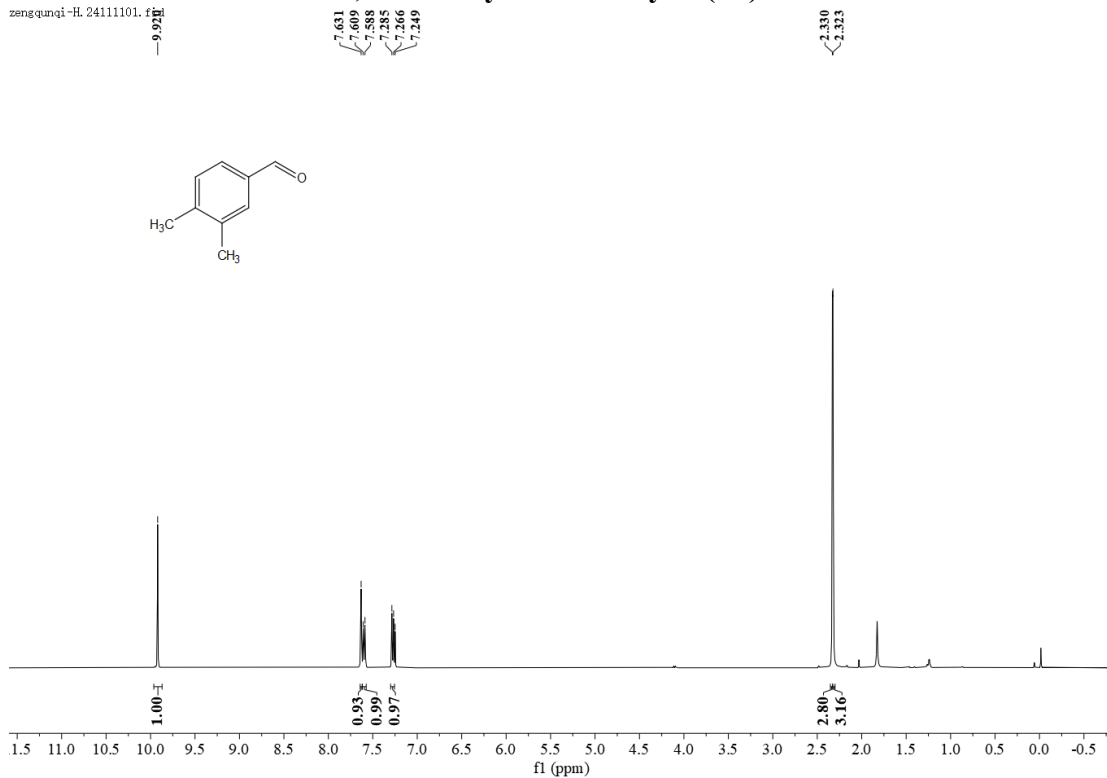

### 3-phenoxybenzaldehyde (2i)

zengqunqi-H. 24111106. f1d

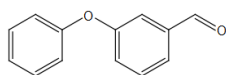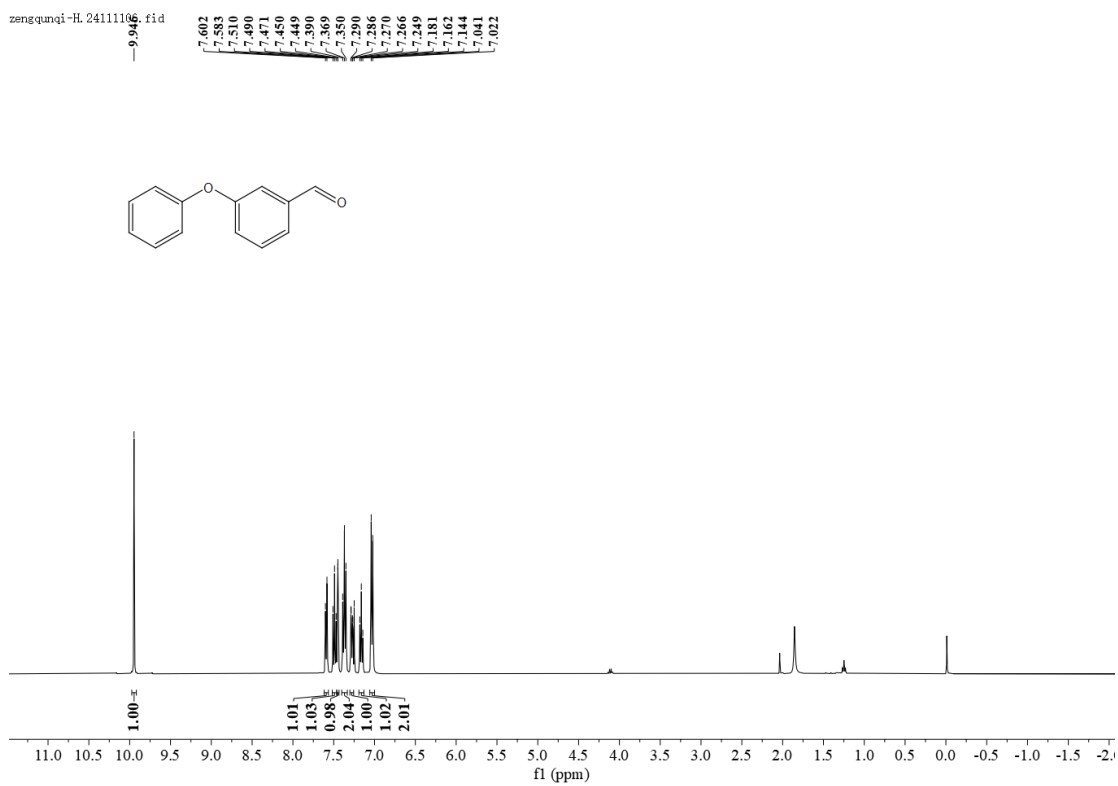

### benzaldehyde (2j)

zengqunqi-H. 24110501. f1d

10.014

7.886  
7.869  
7.647  
7.629  
7.611  
7.547  
7.528  
7.509

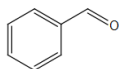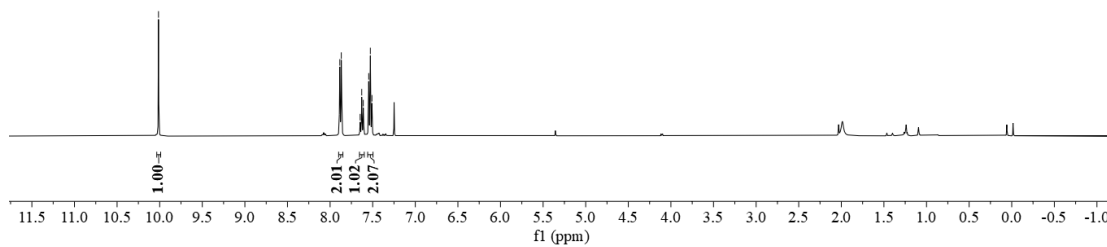

### 4-(tert-butyl)benzaldehyde (2k)

zengqunqi-H. 24110506. f1d

9.99

7.818  
7.797  
7.551  
7.530  
7.249

1.342

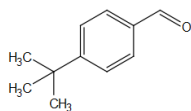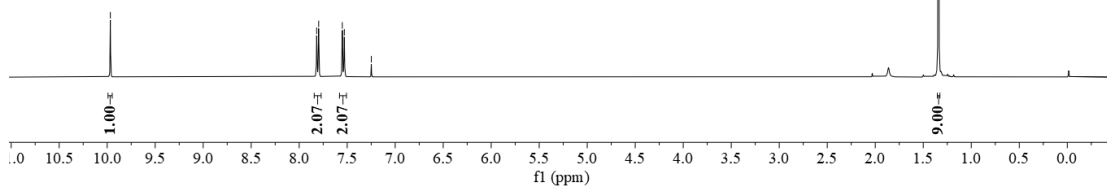

### 3,5-difluorobenzaldehyde (2l)

zengqunqi-H. 24110585. fid

9.938

7.405  
7.392  
7.392  
7.249  
7.104  
7.099  
7.093  
7.084  
7.078  
7.072  
7.062  
7.057  
7.051

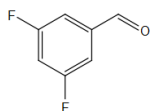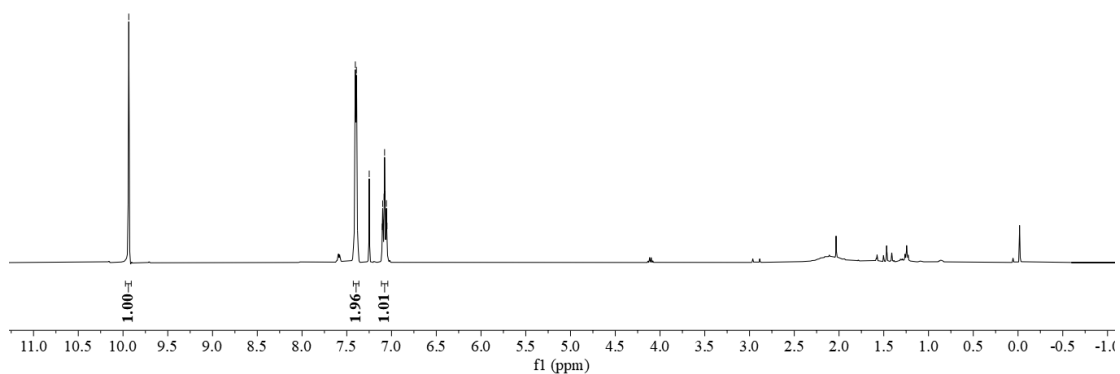

### 2-(4-methoxyphenyl)acetaldehyde (2n)

zengqunqi-H. 24110801. fid

9.711

7.249  
7.134  
7.113  
7.096  
6.985

3.797  
3.623  
3.617

-0.013

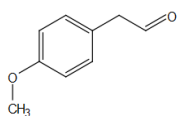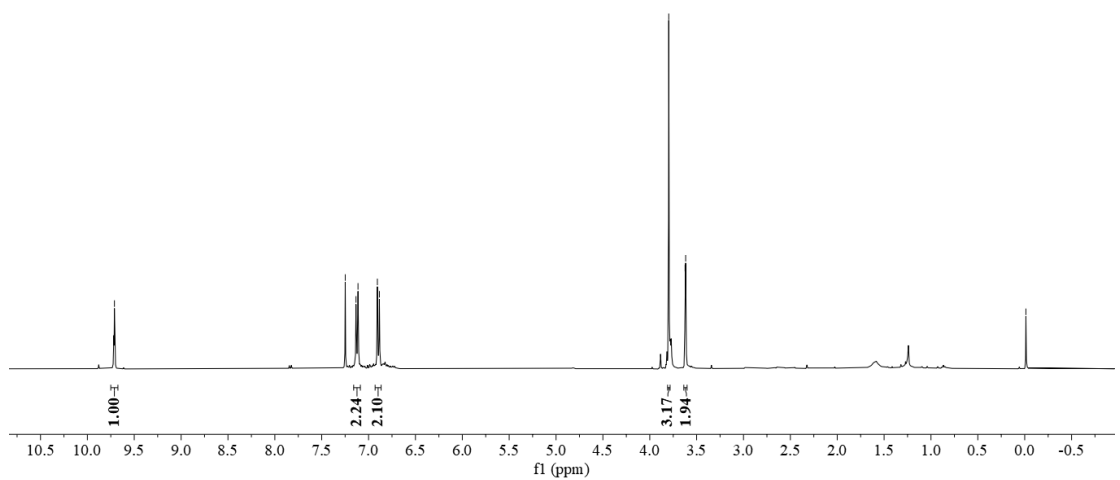

## 2-(4-nitrophenyl)acetaldehyde (2o)

zengqunqi-HL 2004111503.fid

9.870  
9.813  
9.805

8.729

8.207

7.401

7.379

7.259

3.873

3.869

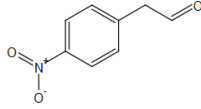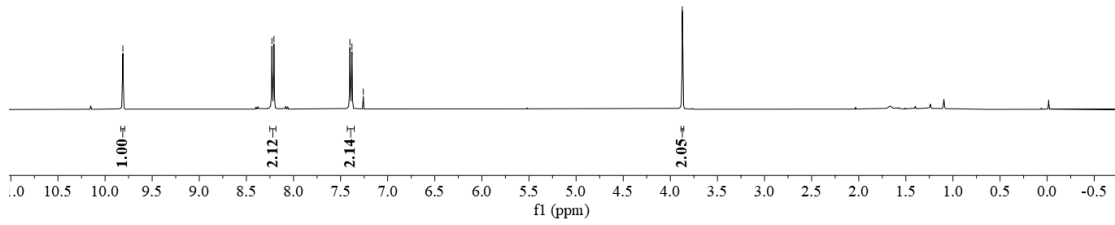

## 2-(2-bromophenyl)acetaldehyde (2p)

zengqunqi-HL 24120701.fid

9.755  
9.752  
9.744

7.616

7.596

7.325

7.322

7.307

7.304

7.288

7.285

7.248

7.238

7.234

7.219

7.215

7.198

7.193

7.178

7.174

7.152

7.152

3.861

3.857

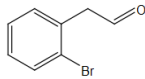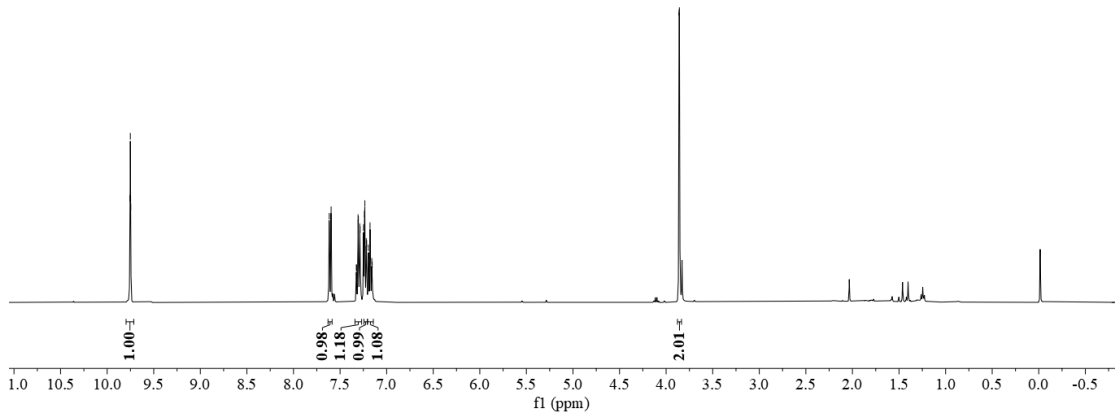

## 2-(4-chlorophenyl)acetaldehyde (2q)

zengqunqi-H. 2501456.fid

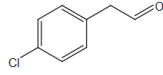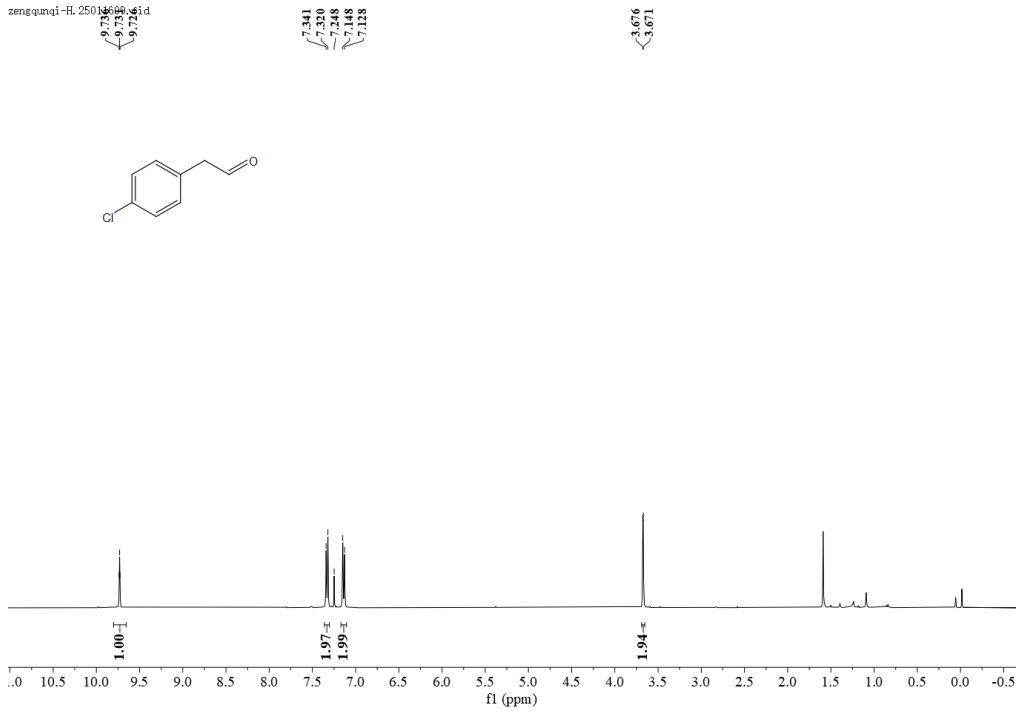

## 2-(thiophen-2-yl)acetaldehyde (2r)

zengqunqi-H. 2501456.fid

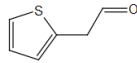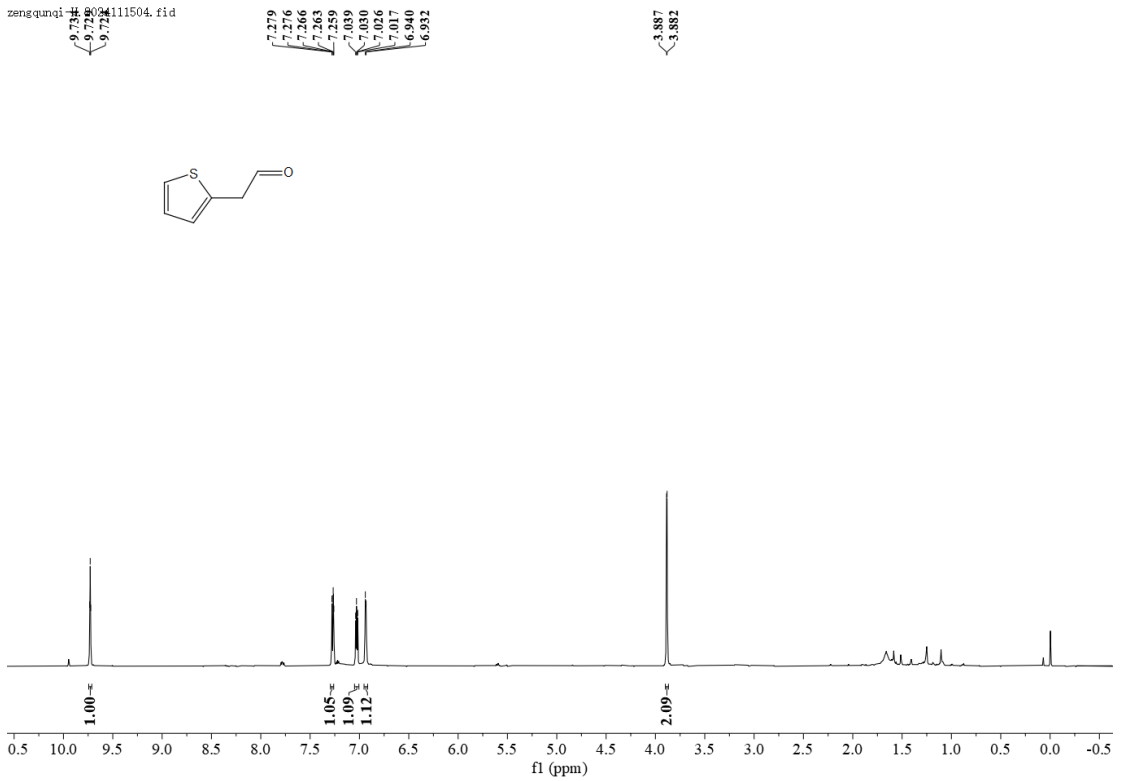

### 3,3,4,4,5,5,6,6,6-nonafluorohexanal (2s)

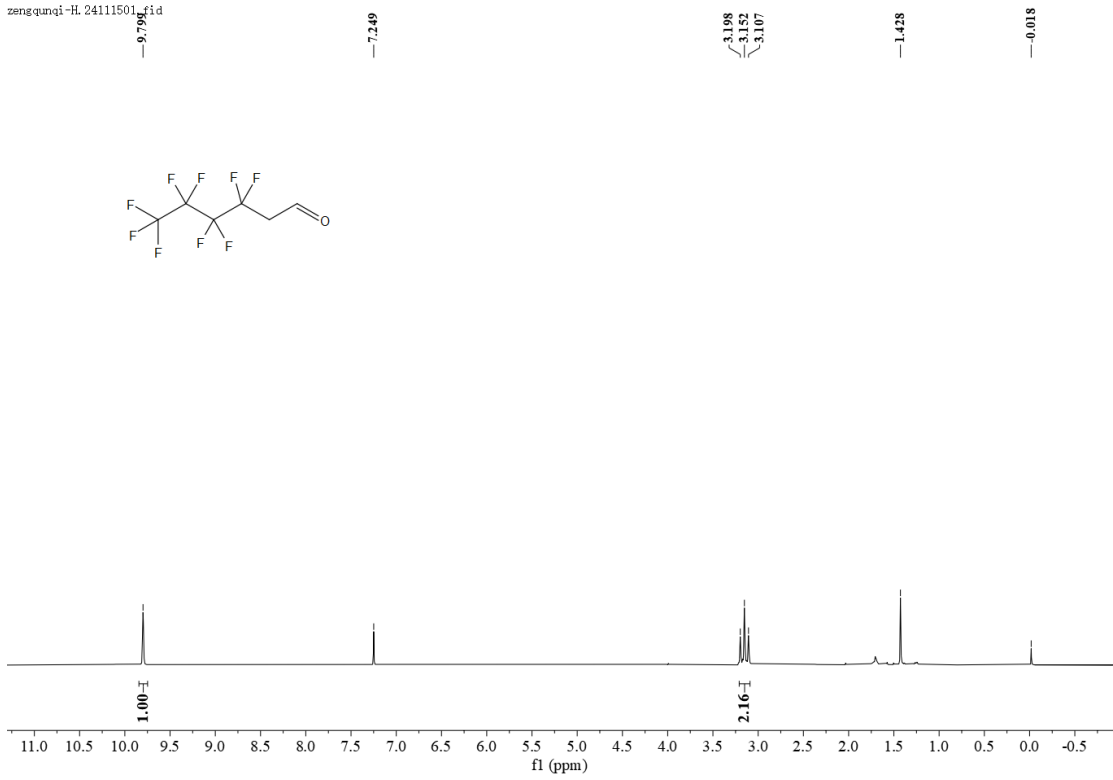

### octanal (2t)

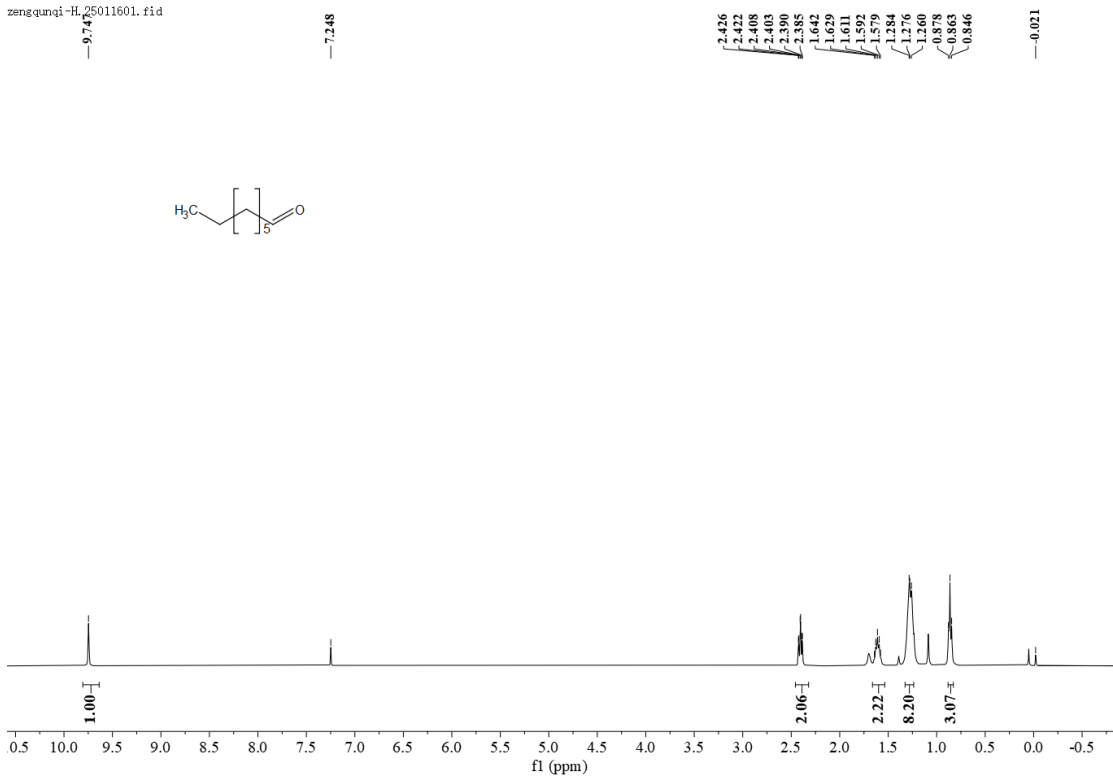

# stearaldehyde (2u)

zengqunqi-HL24082702.fid

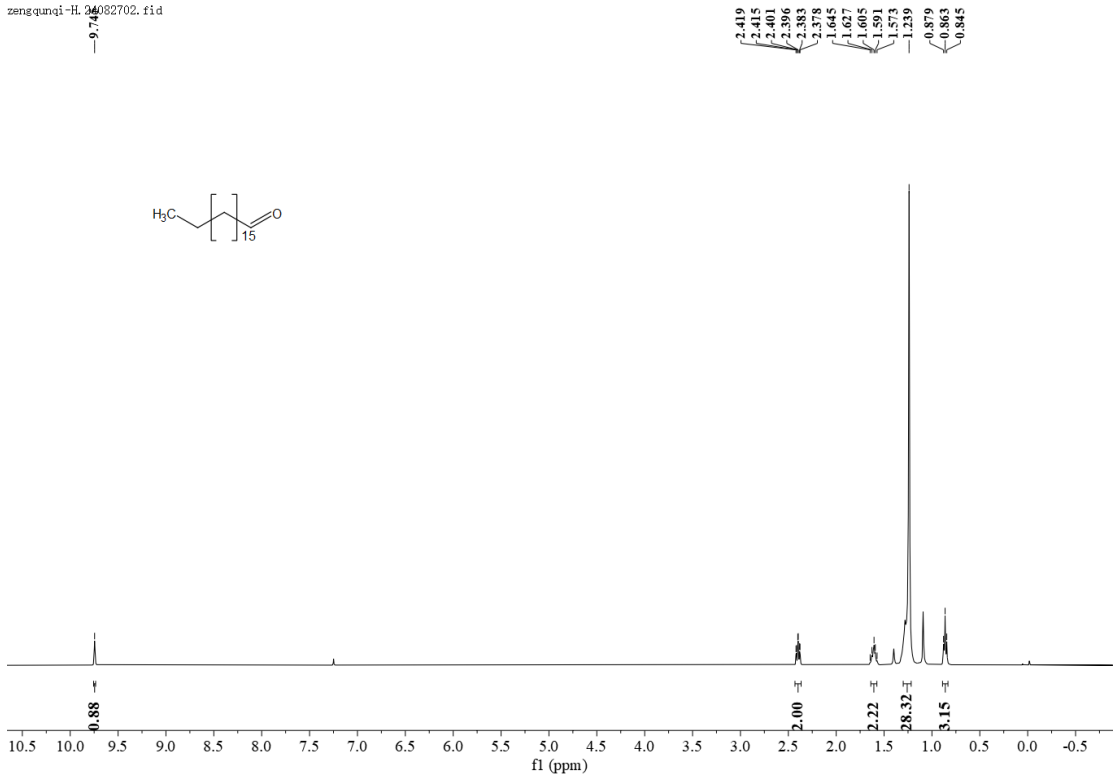

# dodecanal (2v)

zengqunqi-HL24082002.fid

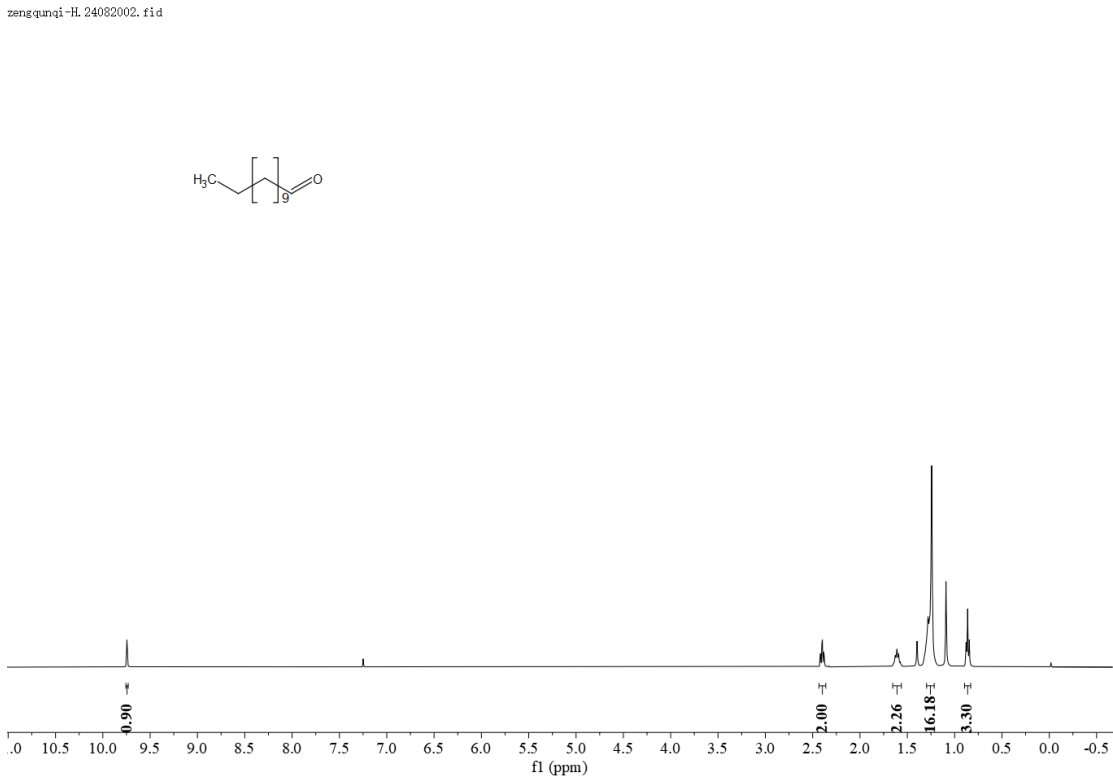

### palmitaldehyde (2w)

zengqunqi-H. 24082701.f1.d

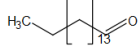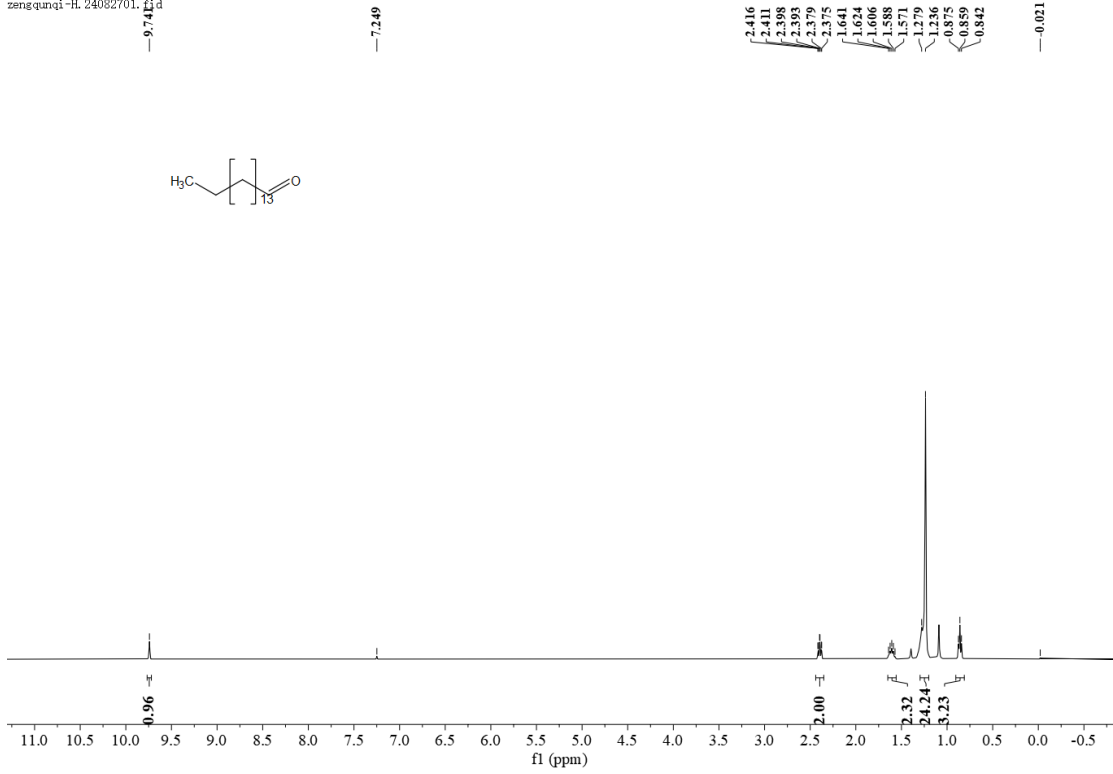

### 3-cyclohexylpropanal (2x)

zengqunqi-H. 25011603.f1.d

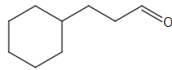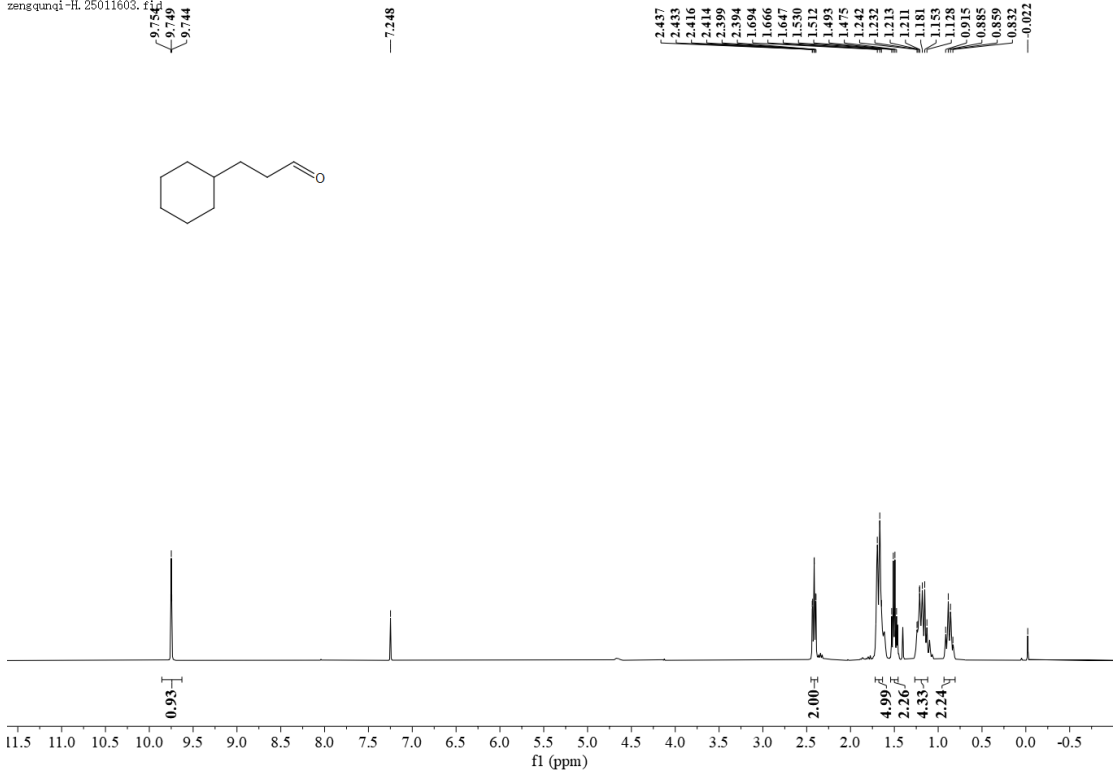

### 8-phenyloctanal (2y)

zengqunqi-HL 24090502.fid

9.752  
9.748  
9.744

7.288  
7.269  
7.250  
7.185  
7.176  
7.168  
7.156

2.612  
2.593  
2.574  
2.426  
2.422  
2.408  
2.403  
2.389  
2.376  
1.613  
1.593  
1.331  
1.325

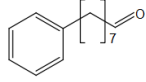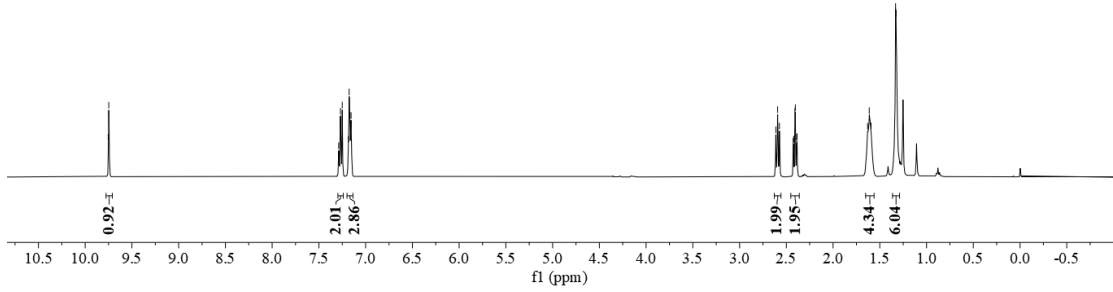

### 3-(4-methoxyphenyl)propanal (2z)

zengqunqi-HL 24090502.fid

9.798

7.111  
7.090  
6.835  
6.814

3.773

2.912  
2.893  
2.875  
2.754  
2.735  
2.716

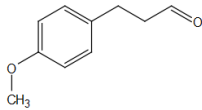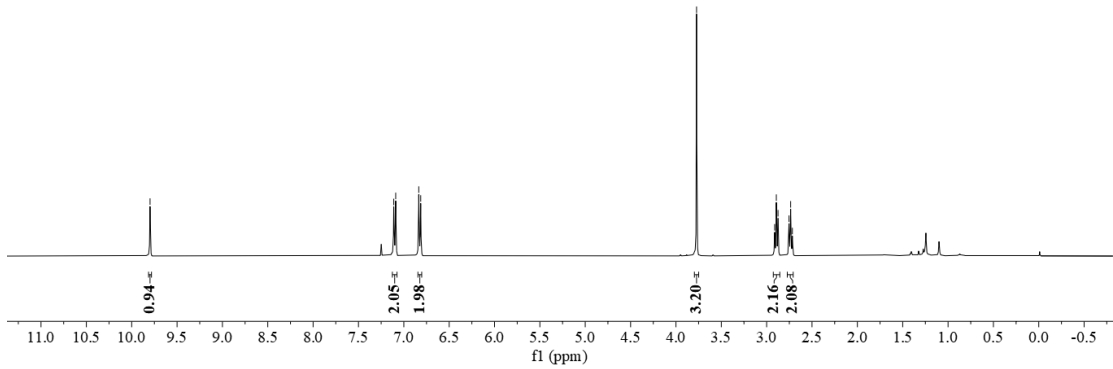

### 3-phenylpropanal (2aa)

zengqunqi-H.24091300.fid

9.816

7.307  
7.288  
7.270  
7.249  
7.218  
7.199  
7.178

2.973  
2.954  
2.935  
2.799  
2.780  
2.760

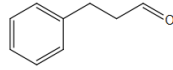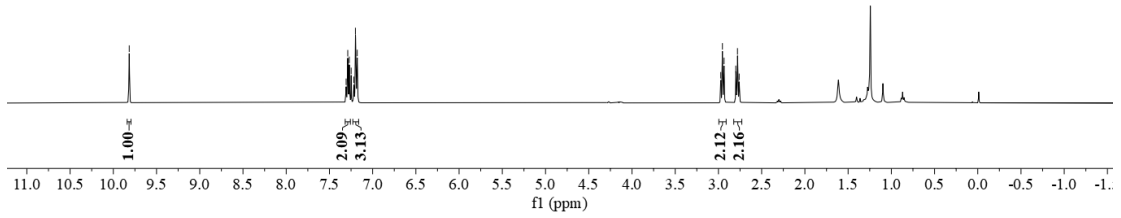

### 4-(3-oxopropyl)benzonitrile (2ab)

zengqunqi-H.2024091008.fid

9.806

7.585  
7.565  
7.544  
7.384  
7.259

3.022  
3.004  
2.986  
2.843  
2.824  
2.806

1.241

0.014

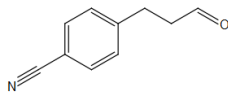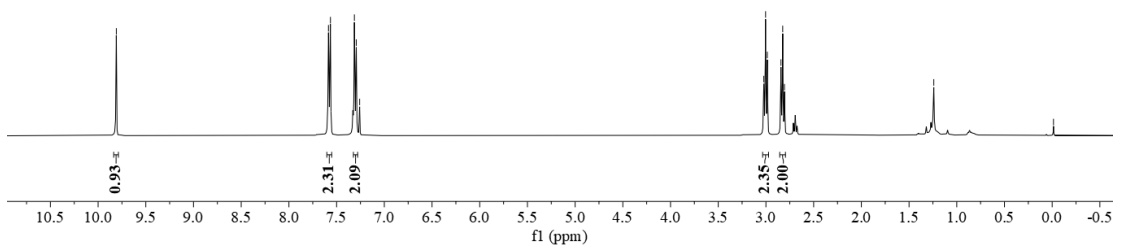

### 4-phenylbutanal (2ac)

zengqunqi-HL 2501602.fid

9.756

7.504  
7.287  
7.267  
7.249  
7.213  
7.175  
7.159

2.671  
2.652  
2.633  
2.470  
2.466  
2.452  
2.448  
2.434  
2.430  
1.995  
1.977  
1.958  
1.939  
1.921

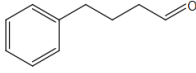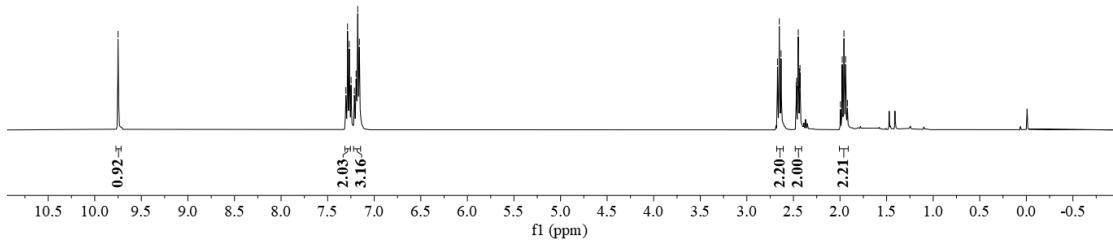

### 3-(4-chlorophenyl)propanal (2ad)

zengqunqi-HL 2409056.fid

9.796

7.254  
7.233  
7.123  
7.102

2.991  
2.913  
2.894  
2.777  
2.758  
2.739

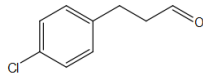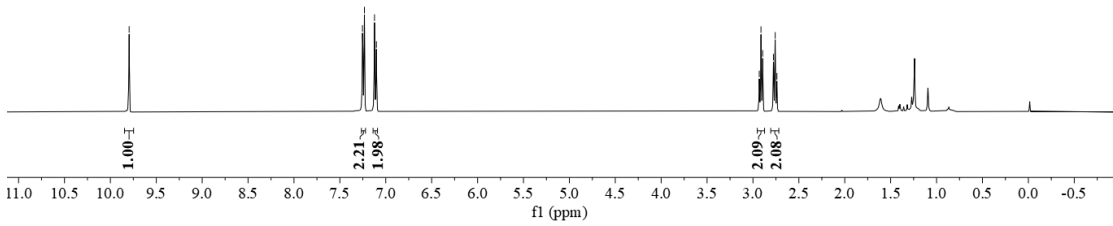

### 5-bromopentanal (2ae)

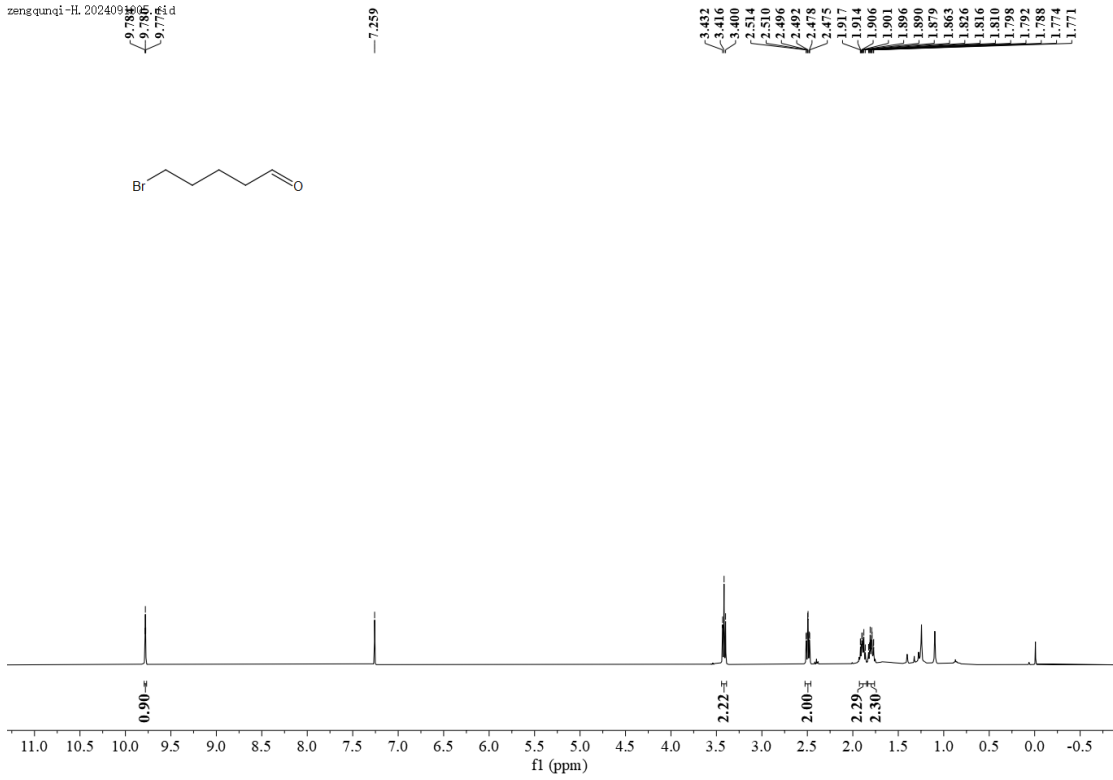

### 4-methoxybutanal (2af)

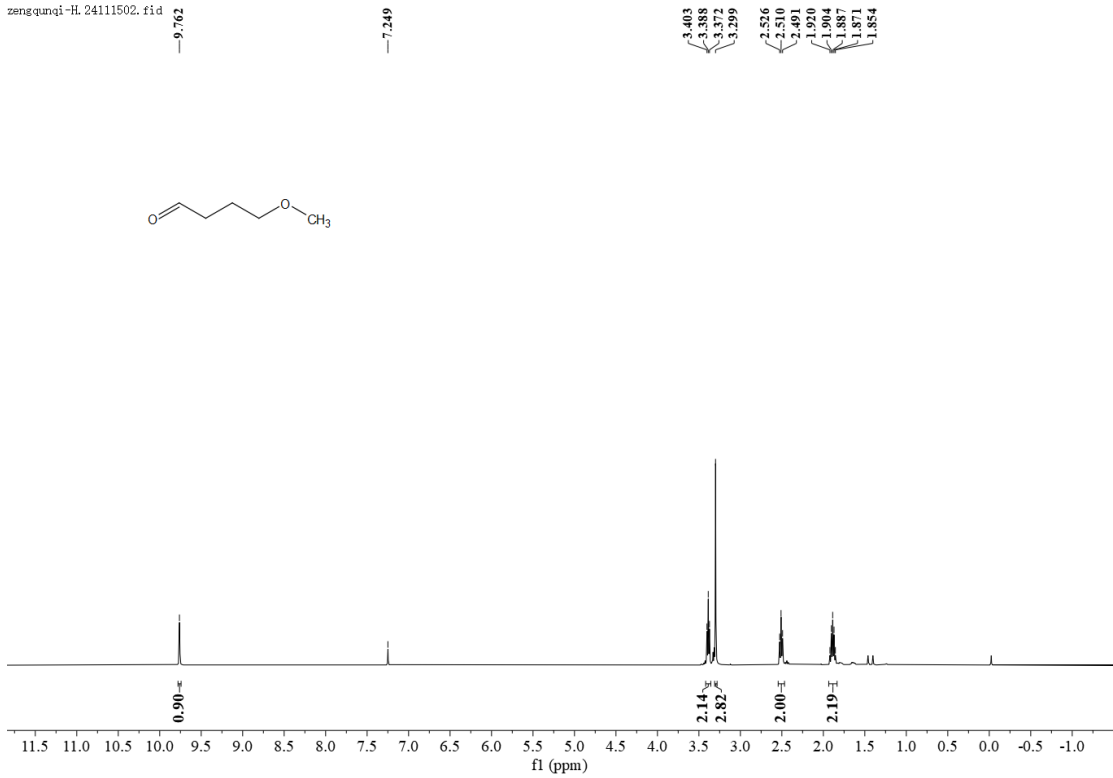

### cyclopropanecarbaldehyde (2ag)

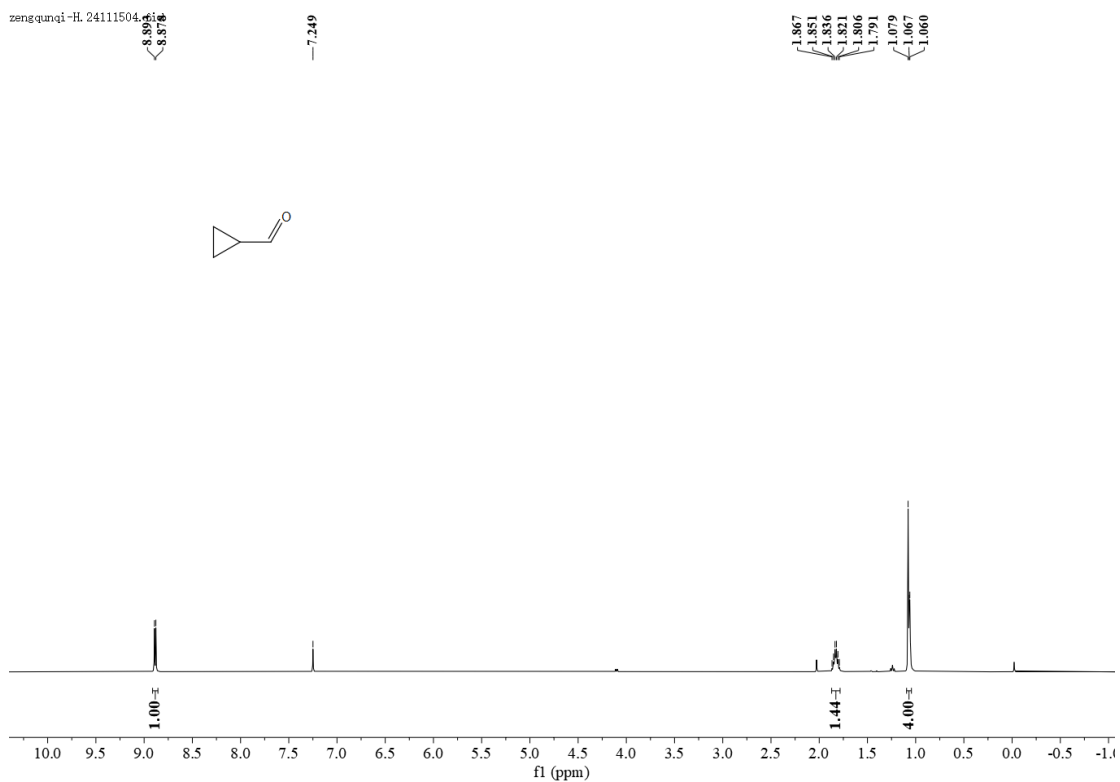

### cinnamaldehyde (2ah)

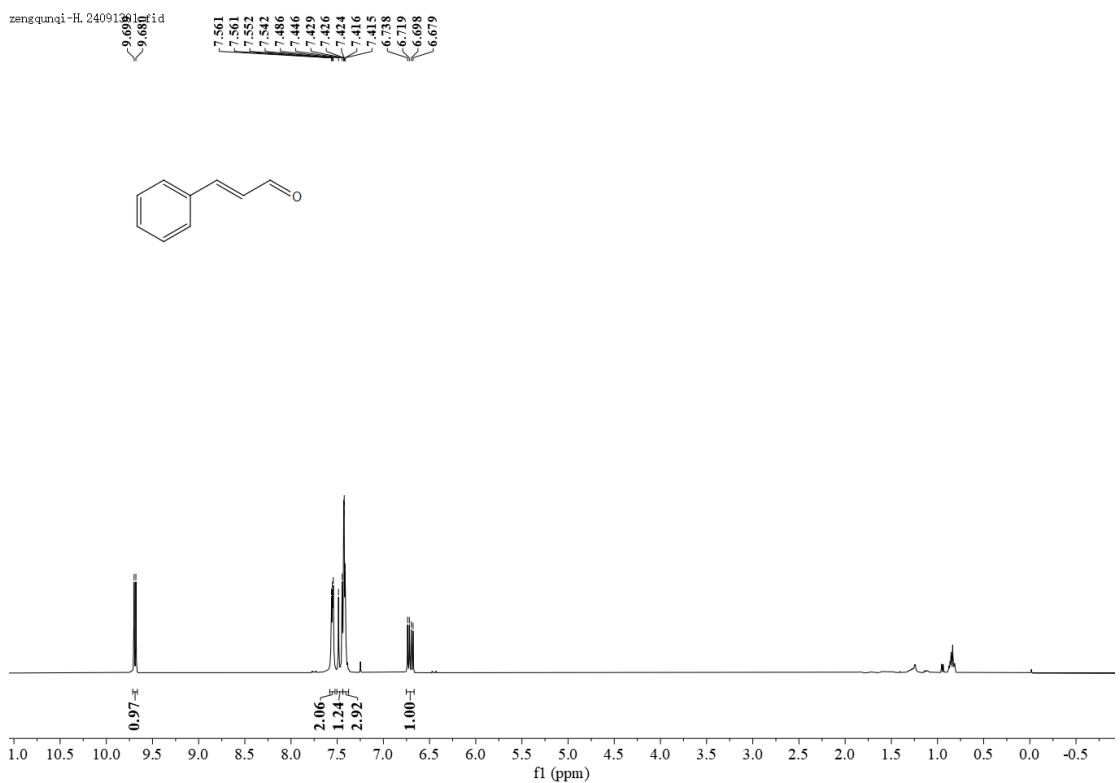

## Piperonal (2ai)

zengqunqi-HL 24110202.fid

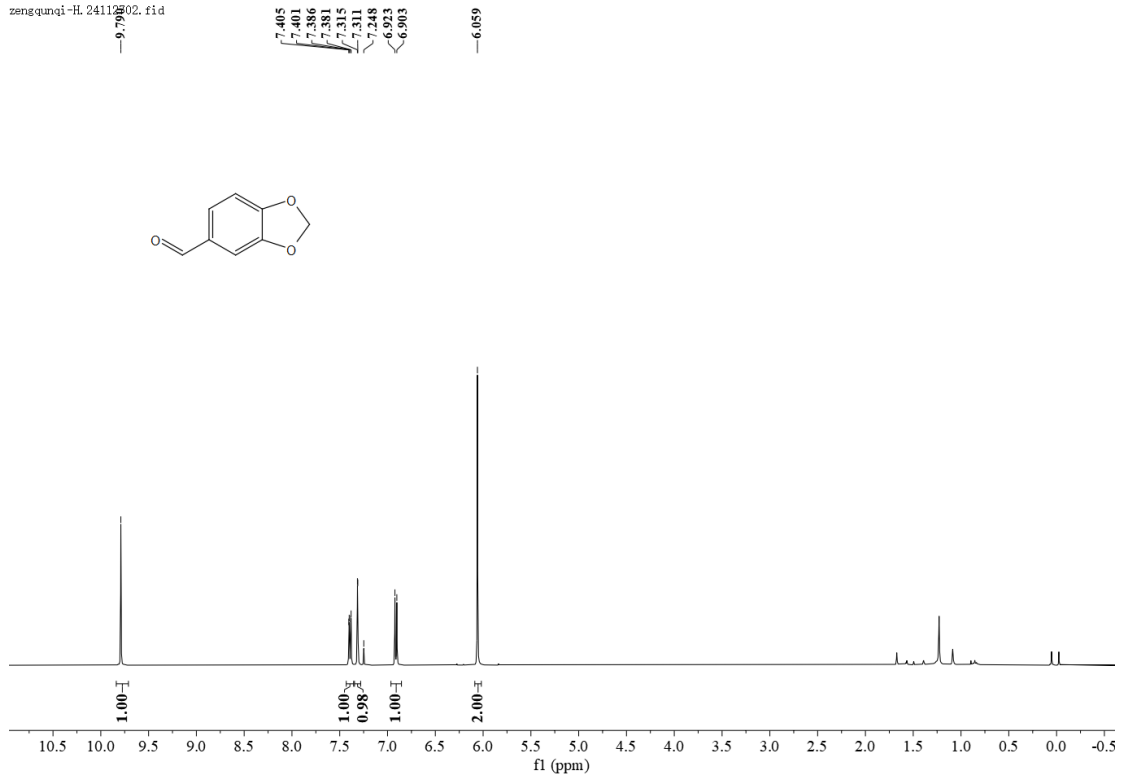

## 2-adamantane ketone (2aj)

zengqunqi-HL 24101906.fid

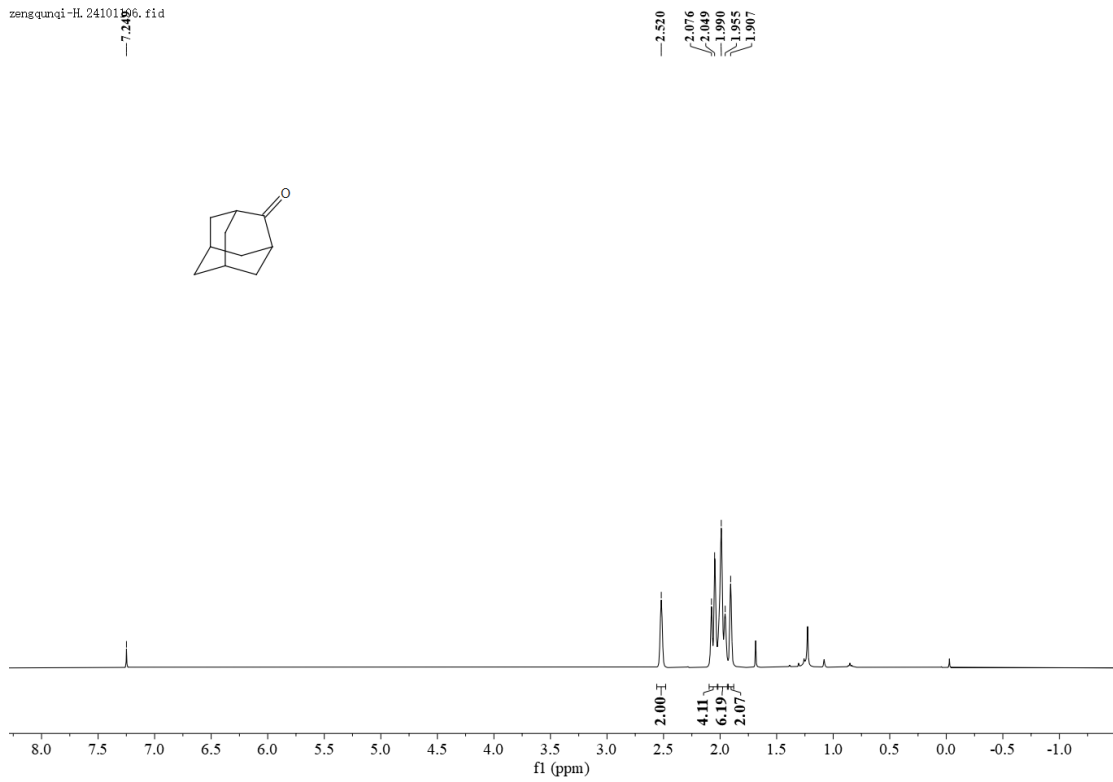

zengqunqi-C-2024102301.fid

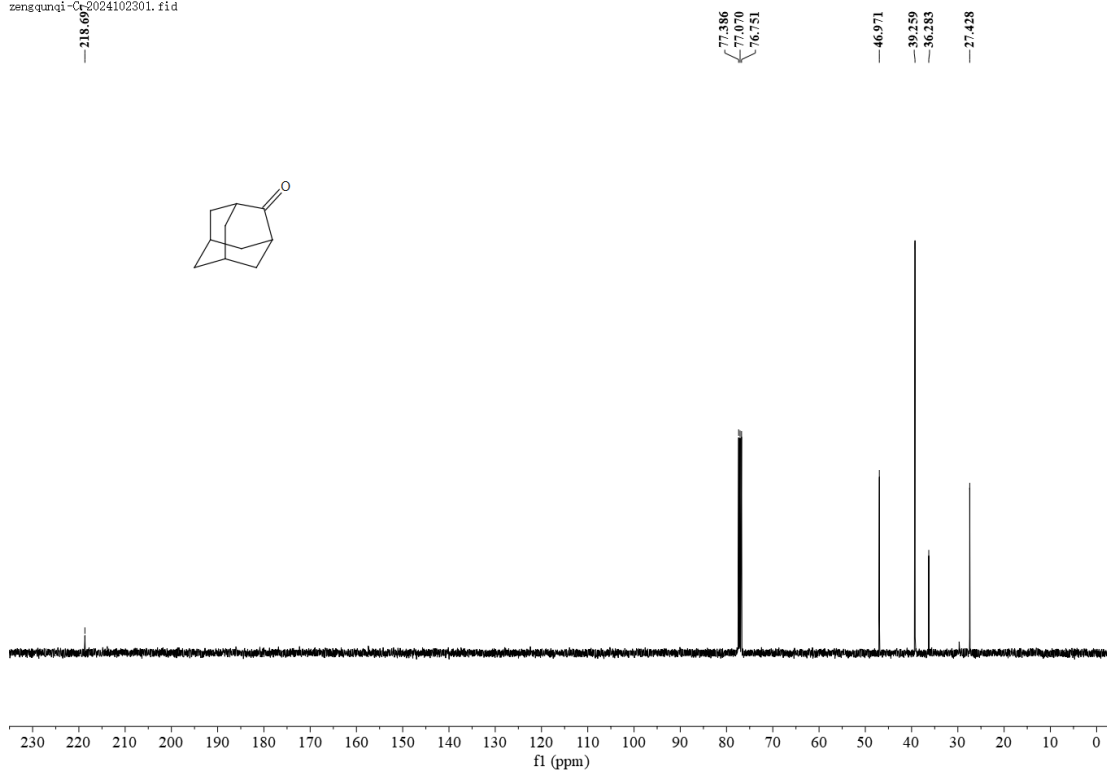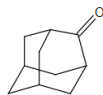

### 2-hydroxycyclohexan-1-one (2ak)

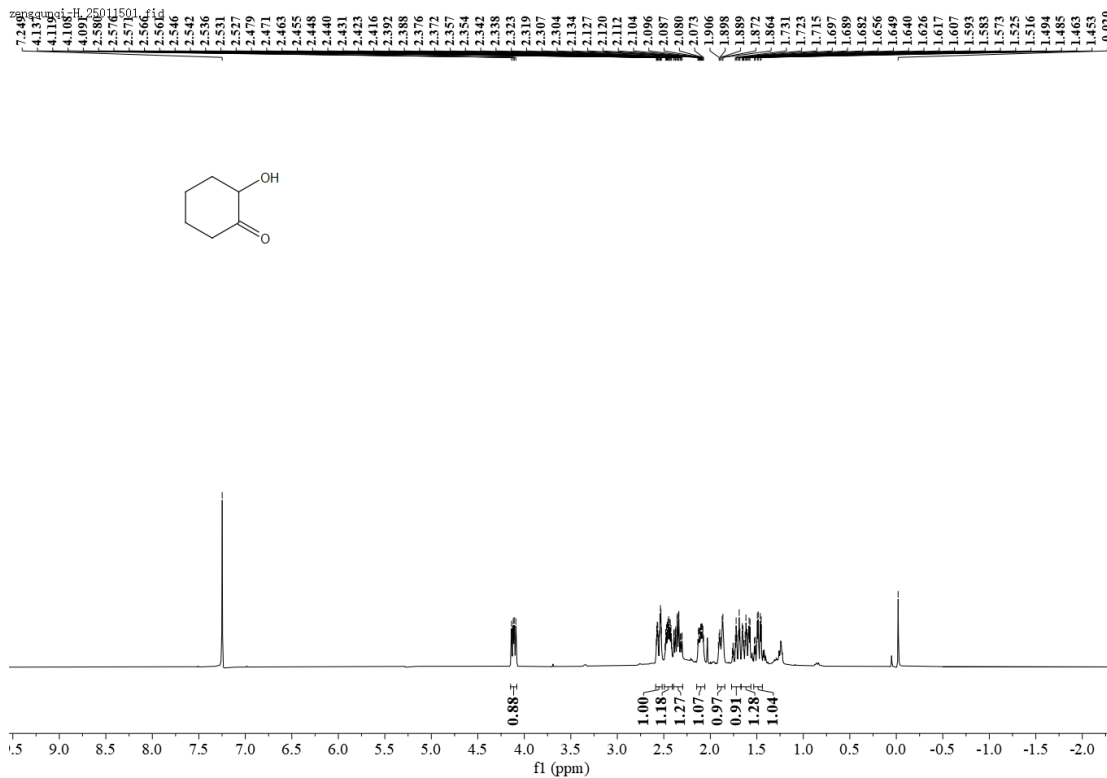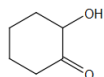

zengqunqi-C. 25011501. fid

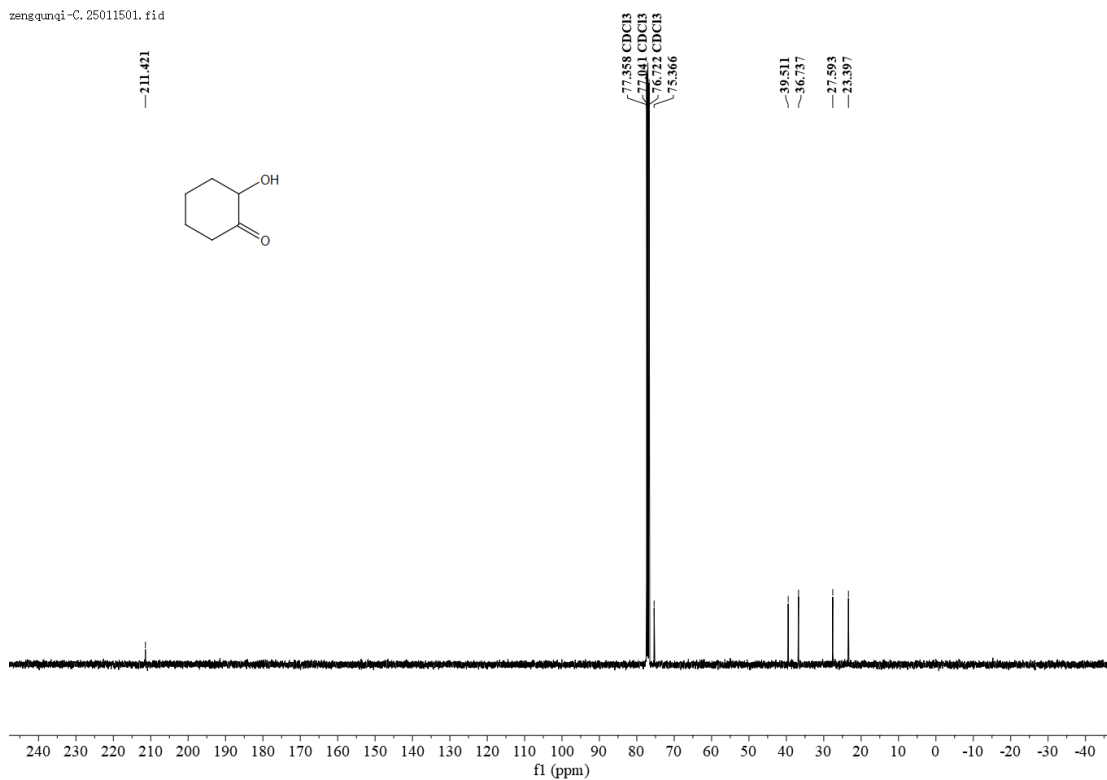

### cyclopentanone (2a)

zengqunqi-H. 25011608. fid

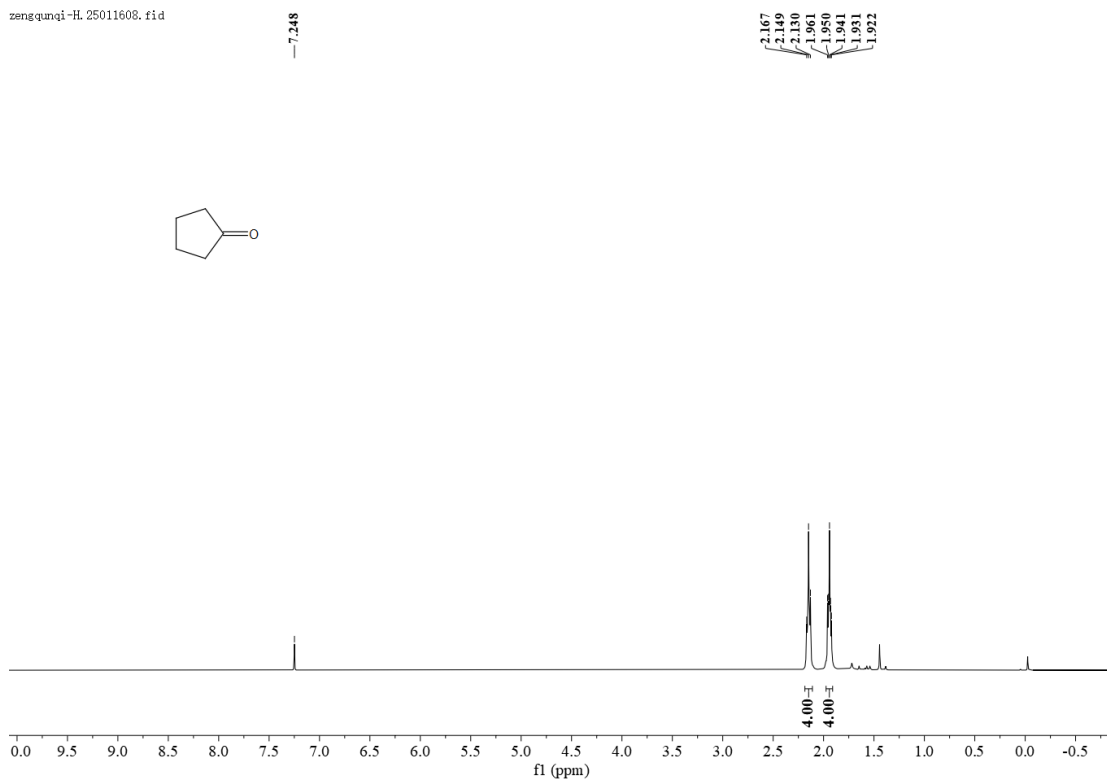

zengqunqi-C. 25041602. fid

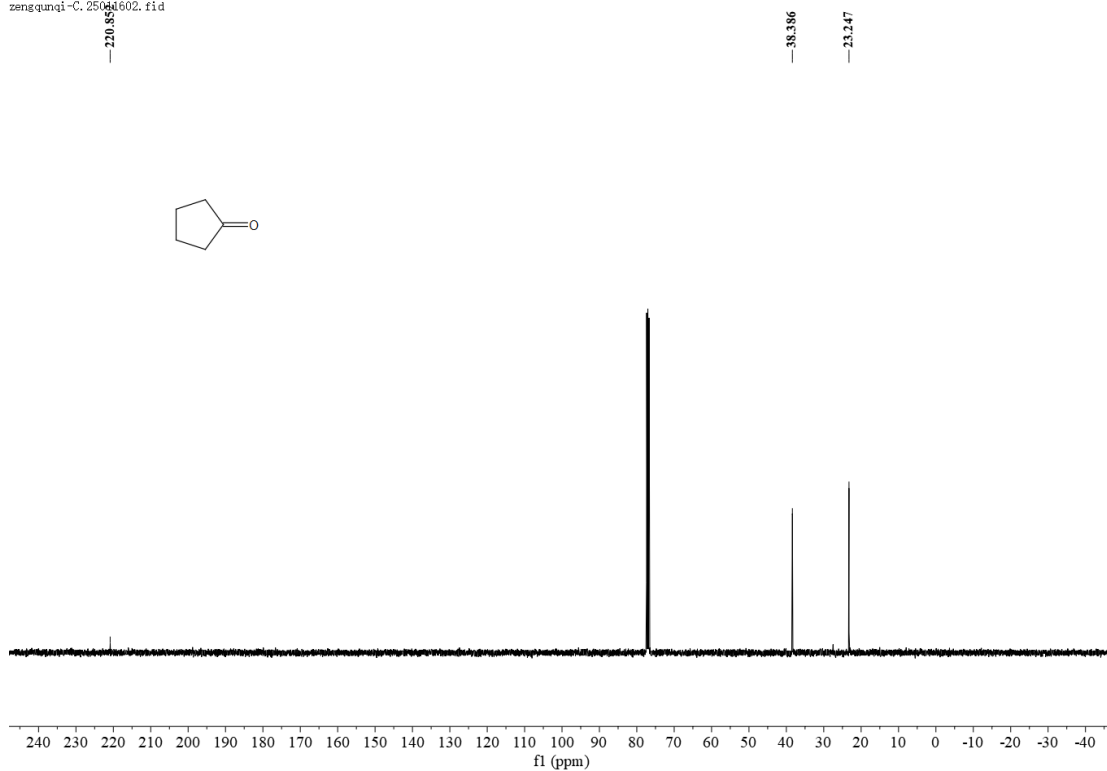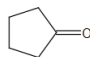

### 4-(tert-butyl)cyclohexan-1-one (2am)

zengqunqi-H. 24112701. fid

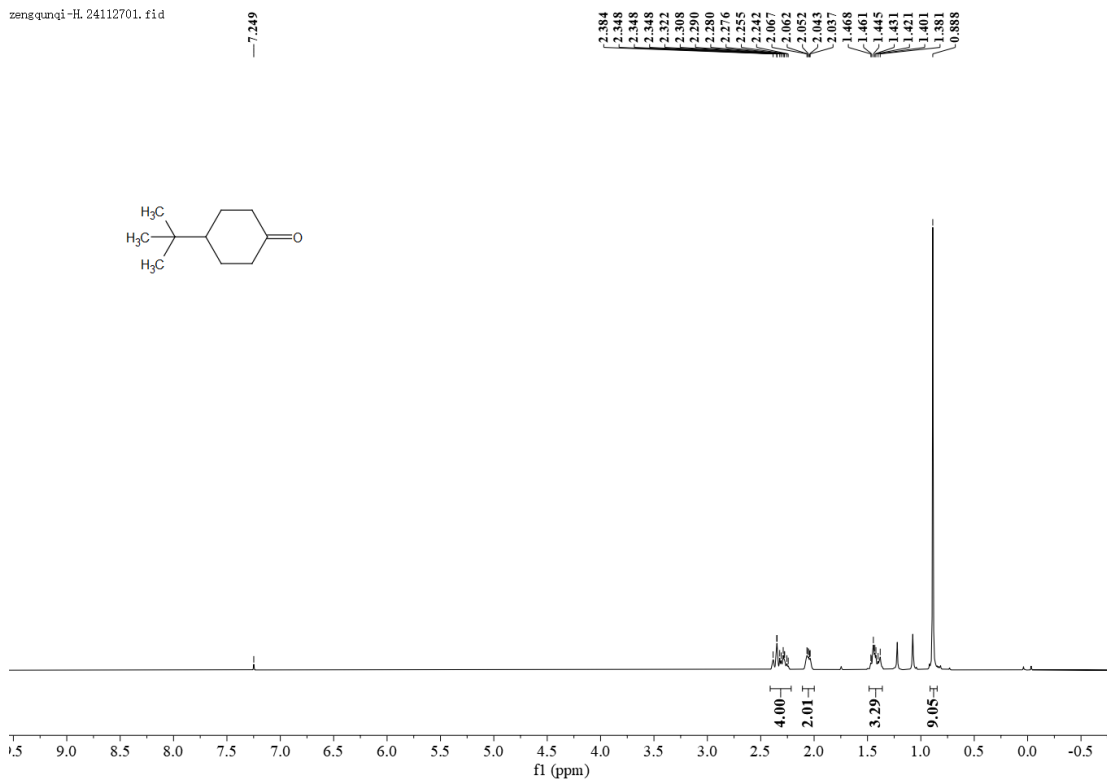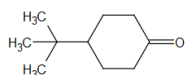

# cyclododecanone (2an)

zengqunqi-H, 25011607.fid

7.248

2.459  
2.451  
2.444  
2.436  
2.428  
1.766  
1.691  
1.675  
1.659  
1.298  
1.291  
1.282  
1.271  
1.261  
1.252  
1.242

0.048  
-0.023

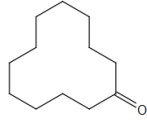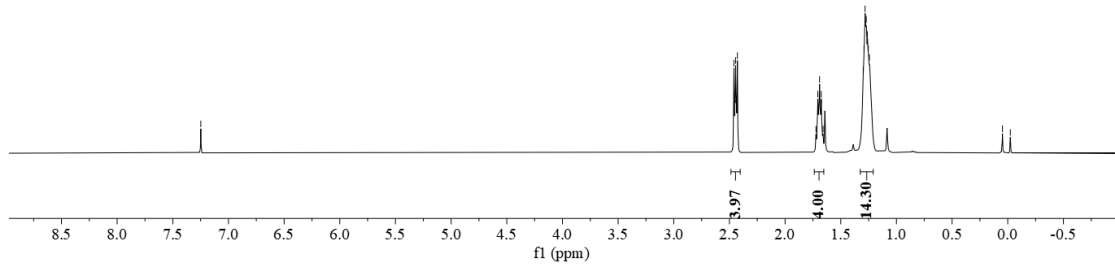

zengqunqi-C, 25011607.fid

213.06

77.362  
77.045  
76.728

40.390  
24.744  
24.582  
24.208  
22.570  
22.312

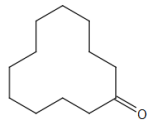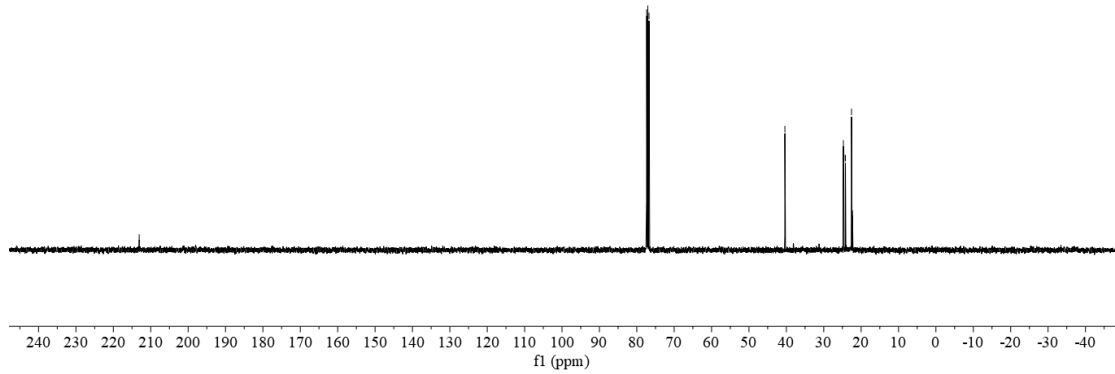

# tetrahydro-4H-pyran-4-one (2ao)

zengqunqi-H. 24121707. fid

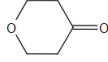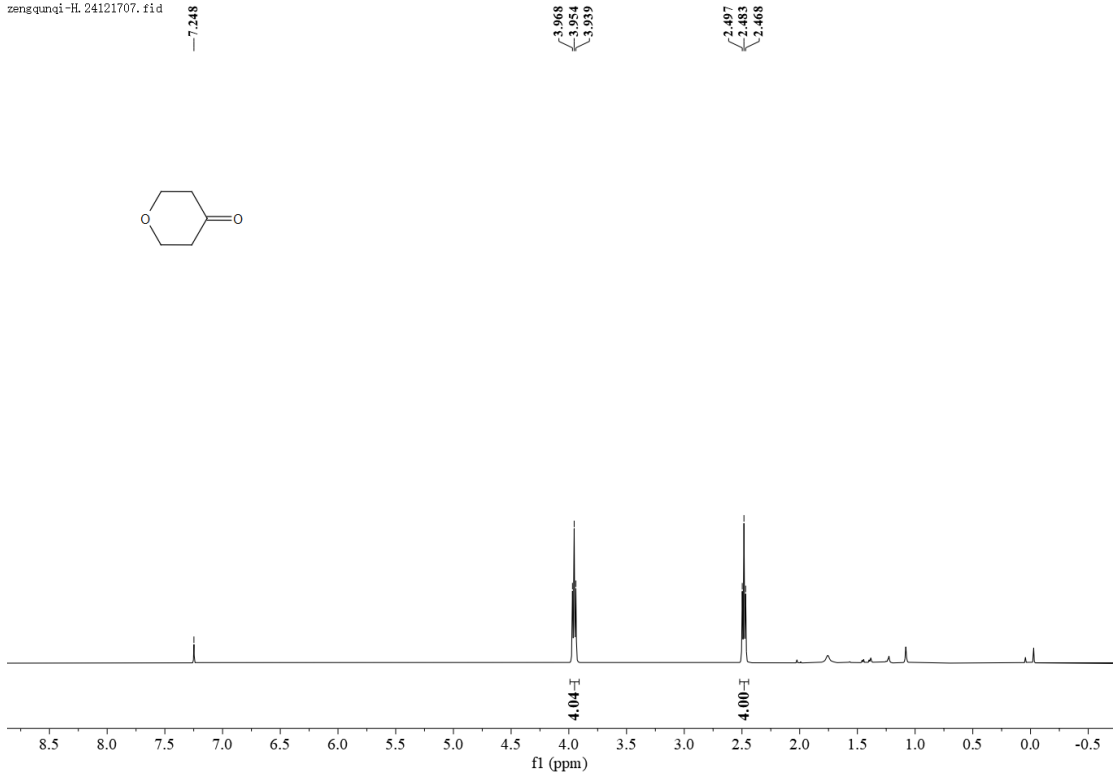

# undecan-2-one (2ap)

zengqunqi-H. 2024112805. fid

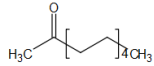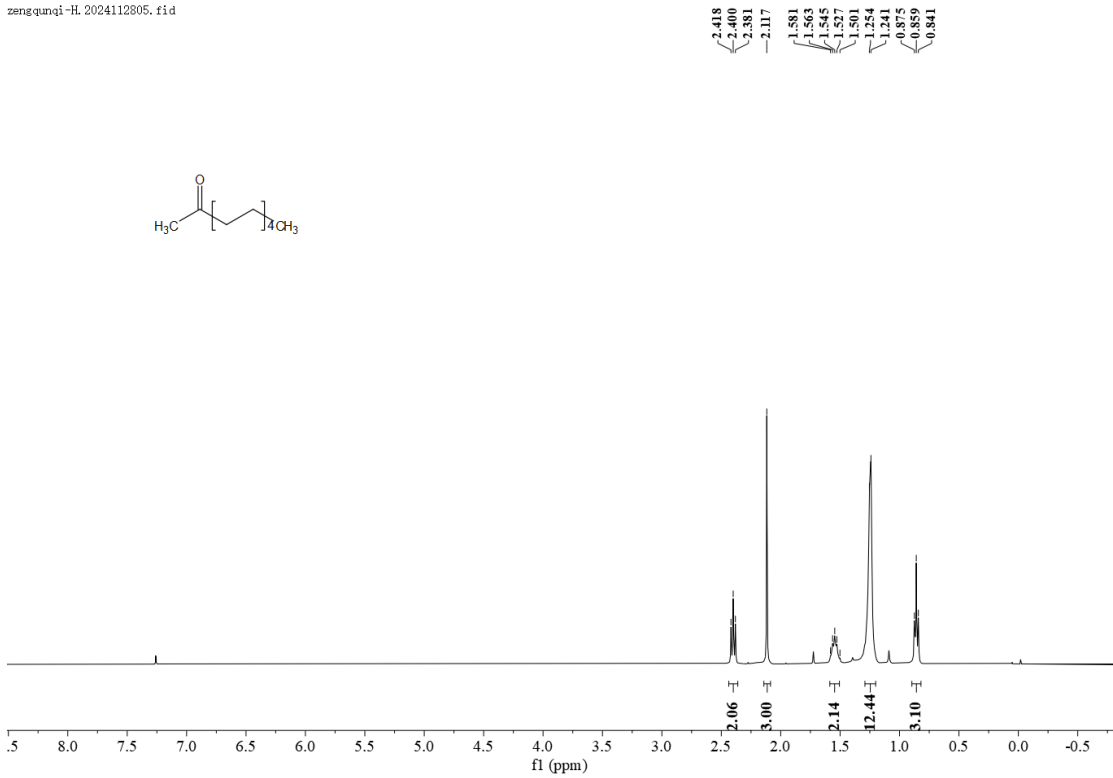

zengqunqi-C. 2024112803.fid

209.508

77.395  
77.079  
76.160

43.835  
31.877  
29.876  
29.445  
29.422  
29.185  
22.688  
22.681  
14.124

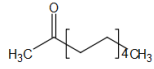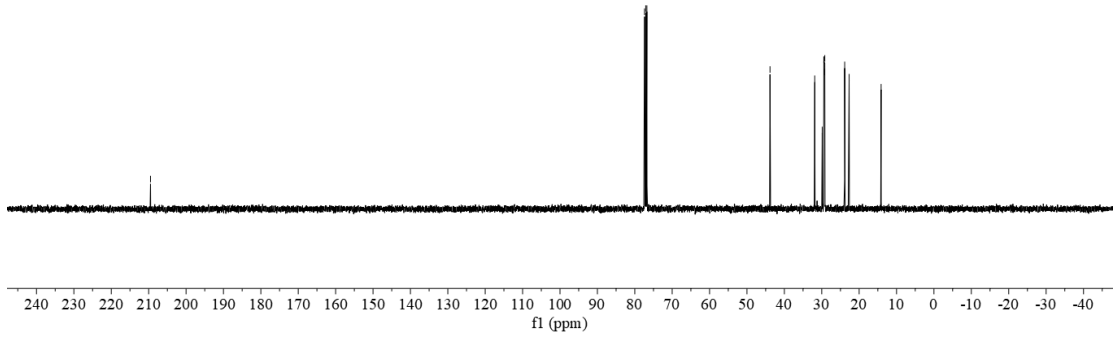

### Estrone benzoate (2aq)

8.196  
8.175  
8.175  
7.644  
7.622  
7.604  
7.511  
7.492  
7.475  
7.345  
7.320  
7.248  
6.993  
6.987  
6.972  
6.966  
6.945  
6.930  
2.940  
2.928  
2.917  
2.540  
2.518  
2.492  
2.471  
2.440  
2.430  
2.424  
2.407  
2.399  
2.328  
2.312  
2.303  
2.287  
2.276  
2.190  
2.168  
2.145  
2.121  
2.099  
2.088  
2.075  
2.059  
2.046  
2.045  
2.033  
2.010  
2.004  
1.997  
1.986  
1.979  
1.979  
1.961  
1.955  
1.946  
1.661  
1.637  
1.630  
1.615  
1.608  
1.601  
1.584  
1.552  
1.539  
1.520  
1.493  
1.485  
1.462  
1.458  
1.434  
1.405  
0.073  
0.007

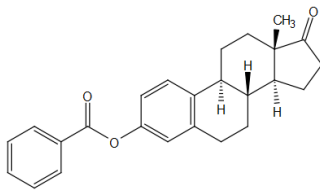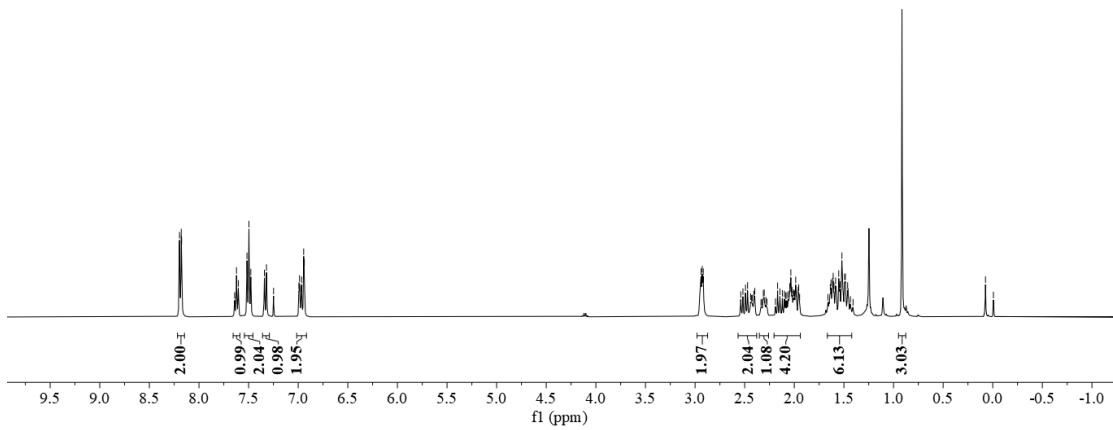

zengqunqi-C. 24112901.fid

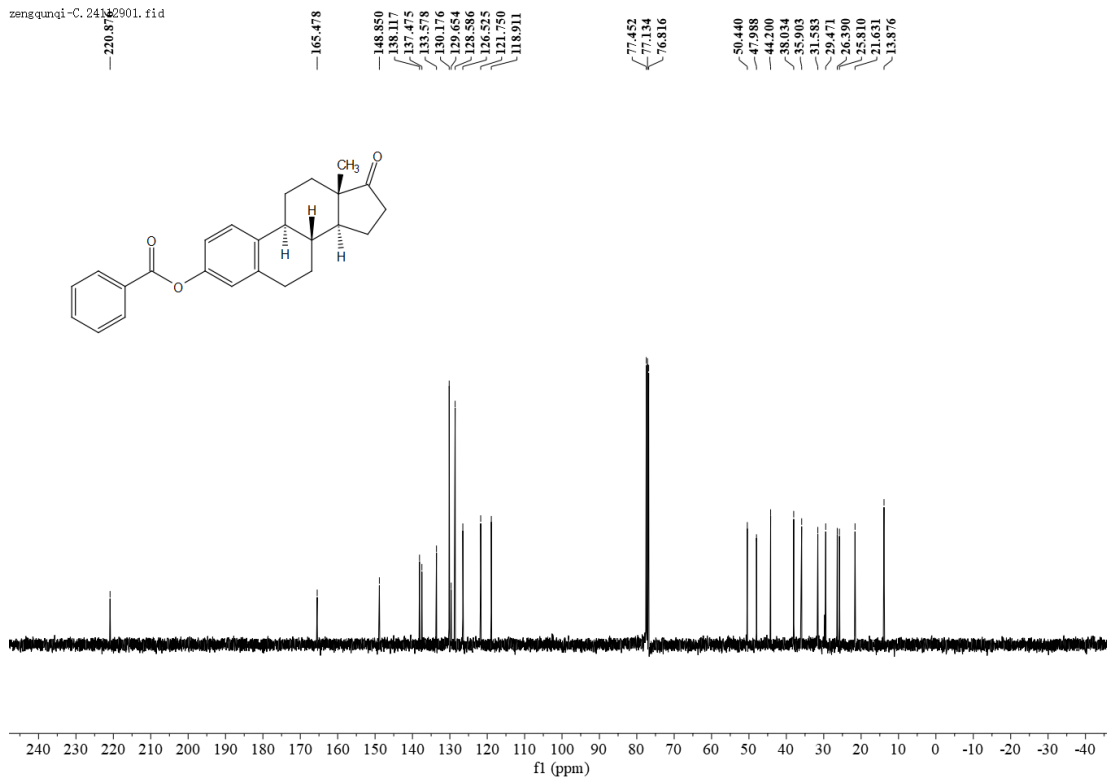

### hex-1-yn-3-one (2ar)

zengqunqi-H. 24112801.fid

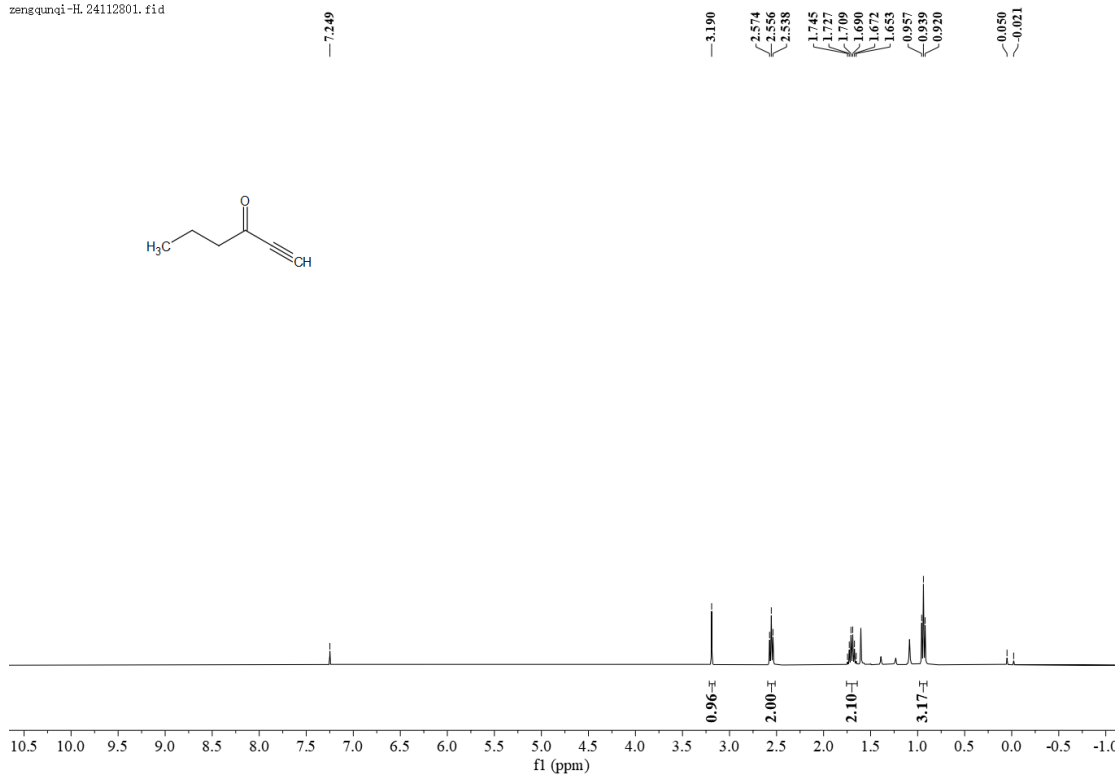

zengqunqi -C. 2024112804.fid

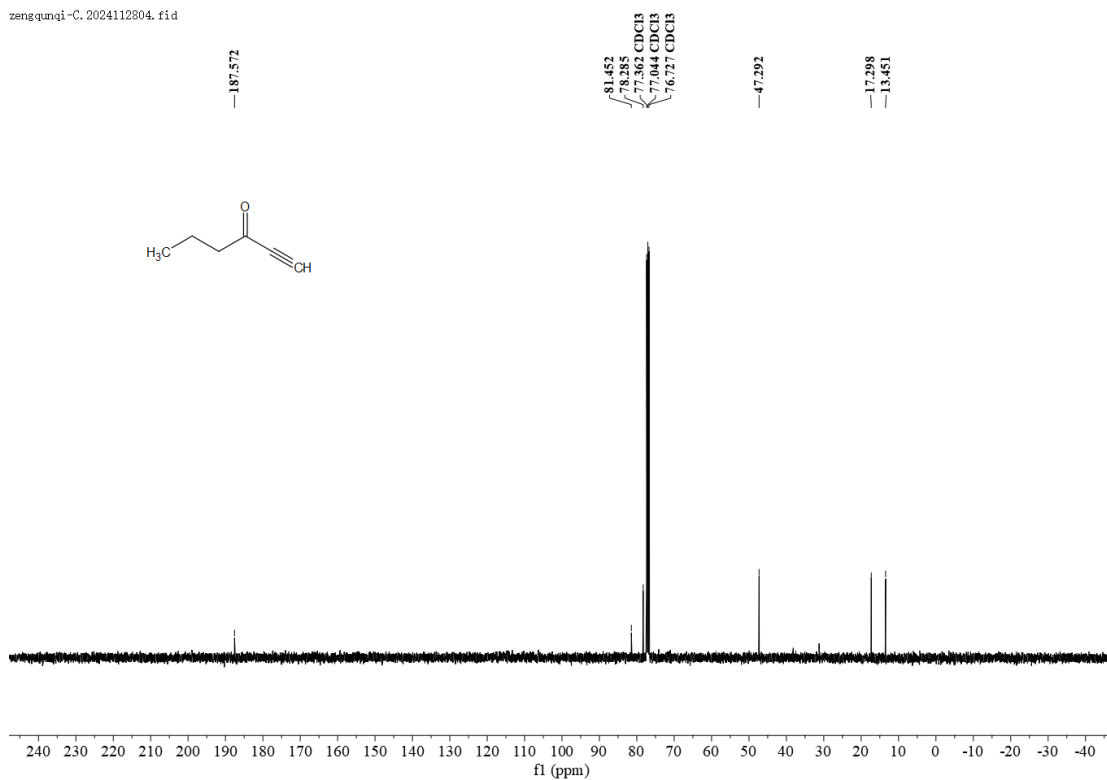

### acetophenone (2as)

zengqunqi -H. 2024112806

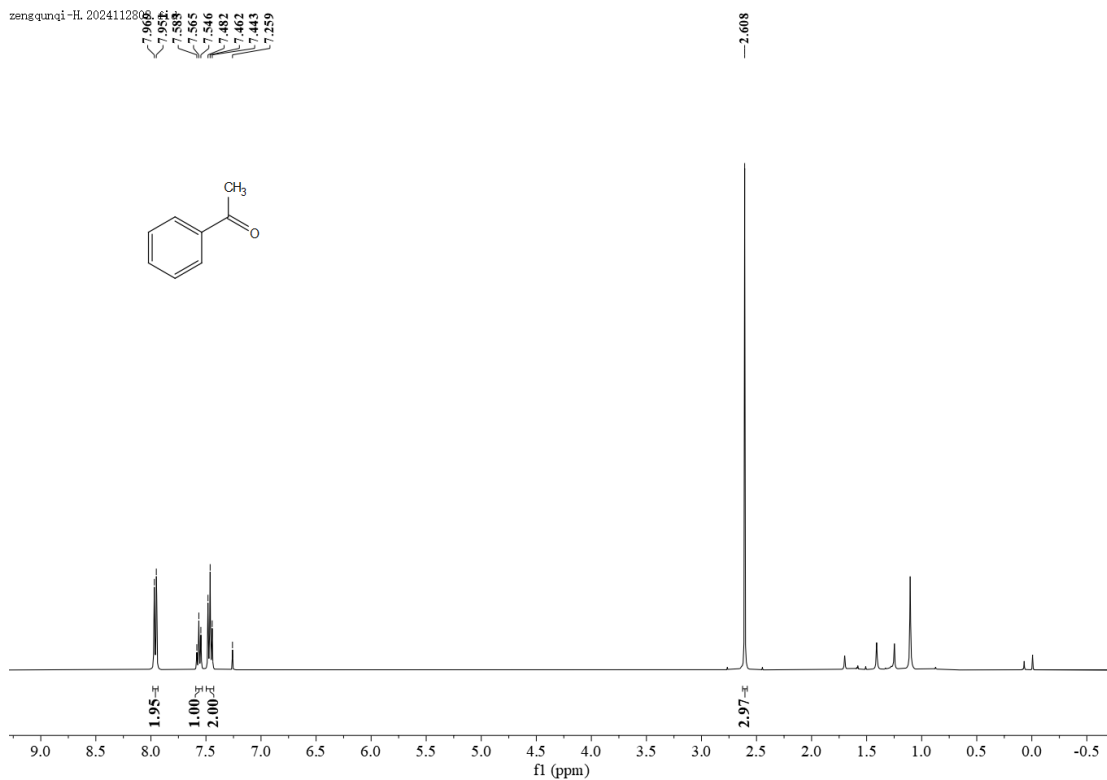

Supplement: d6cc00799f1.pdf [file d6cc00799f1.pdf]
